# Supplementary material for: 4,5-Dihydro-5-Oxo-Pyrazolo[1,5-a]Thieno[2,3-c]Pyrimidine: A Novel Scaffold Containing Thiophene Ring. Chemical Reactivity and In Silico Studies to Predict the Profile to GABAA Receptor Subtype
Source: MDPI journal article supplement (doi:10.3390/molecules28073054), 2023-03-29
Supplement: s1 [file s1]

## Supporting Information

### For

### **4,5-Dihydro-5-oxo-pyrazolo[1,5-a]thieno[2,3-c]pyrimidine: a novel scaffold containing thiophene ring. Chemical reactivity and *in silico* studies to predict the profile to GABAA receptor subtype**

Letizia Crocetti <sup>1</sup>, Gabriella Guerrini <sup>1\*</sup>, Fabrizio Melani <sup>1</sup>, Claudia Vergelli<sup>1</sup>, and Maria Paola Giovannoni<sup>1</sup>

<sup>1</sup>Neurofarba, Pharmaceutical and Nutraceutical Section, University of Florence, Via Ugo Schiff 6, 50019, Sesto Fiorentino, Italy.

\*Correspondence: [gabriella.guerrini@unifi.it](mailto:gabriella.guerrini@unifi.it) (GG); Tel.: Tel.: +39-055-4573766

#### **Table of contents:**

- Chemistry. Materials and methods.
- <sup>1</sup>H-NMR spectra of all compounds
- <sup>13</sup>C-NMR spectra of some representative compounds (**6, 8, 10c, 11c, 11e, 12c, 12d, 12e, 12f, 22a, 22b, 23**)
- Elemental analysis (Table S1)
- General chemical structure with atoms numeration

## Chemistry

### Materials and Methods

Reagents and starting materials were obtained from commercial sources. Extracts were dried over  $\text{Na}_2\text{SO}_4$ , and the solvents were removed under reduced pressure. All reactions were monitored by thin layer chromatography (TLC) using commercial plates pre-coated with Merck silica gel 60 F-254. Visualization was performed by UV fluorescence ( $\lambda_{\text{max}} = 254 \text{ nm}$ ) or by staining with iodine or potassium permanganate. Chromatographic separations were performed on a silica gel column by gravity chromatography (Kieselgel 40, 0.063-0.200 mm; Merck), flash chromatography (Kieselgel 40, 0.040-0.063 mm; Merck), silica gel preparative TLC (Kieselgel 60 F<sub>254</sub>, 20 x 20 cm, 2 mm). Yields refer to chromatographically and spectroscopically pure compounds, unless otherwise stated. Compounds were named following IUPAC rules, as applied by Beilstein-Institut AutoNom 2000 (4.01.305) or CA Index Name. All melting points were determined on a microscope hot stage Büchi apparatus and are uncorrected. Monodimensional spectra  $^1\text{H}$ -NMR and  $^{13}\text{C}$ -NMR were registered by a 400 MHz field through Avance 400 apparatus (Bruker Biospin Version 002 with SGU). Chemical shifts ( $\delta$ ) are in parts per million (ppm) approximated by the nearest 0.01 ppm, using the solvent as internal standard. Coupling constants ( $J$ ) are in Hz, they were calculated by Top Spin 3.1 and approximated by 0.1 Hz. Data are reported as follows: chemical shift, multiplicity (exch, exchange; br, broad; s, singlet; d, doublet; t, triplet; q, quartet; m, multiplet; or a combination of those e.g: dd), integral, assignments, and coupling constant. High resolution mass spectrometry (HRMS) analysis was performed with a Thermo Finnigan LTQ Orbitrap mass spectrometer equipped with an electrospray ionization source (ESI). The solvents used in HRMS were acetonitrile (Chromasolv grade) purchased from Sigma-Aldrich (Milan, Italy) and mQ water 18 M $\Omega$  cm, obtained from Millipore's Simplicity system (Milan, Italy). The accurate mass measure was performed by introducing sample solution ( $1.0 \mu\text{g mL}^{-1}$  in mQ water: acetonitrile 50:50) via syringe pump at  $10 \mu\text{L min}^{-1}$ , and the signal of the positive ions was acquired. The experimental conditions allowed monitoring of the protonated molecules ( $[\text{M}+\text{H}]^+$  species) with a proper dwell time to achieve 60.000 units of resolution at full width at half maximum (FWHM). All new compounds possess a purity  $\geq 95\%$ ; microanalyses indicated by the symbols of the elements were performed with a Perkin-Elmer 260 elemental analyzer for C, H, and N, and they were within  $\pm 0.4\%$  of the theoretical values.

**Methyl 3-hydrazinothiophene-2-carboxylate hydrochloride (2).** The commercial starting material, methyl 3-aminothiophene-2-carboxylate **1** (8.9 mmol, 1.4 g), was solubilized in 15 mL of HCl 6N and cooled at  $0^\circ\text{C}$ . To this solution was dripped  $\text{NaNO}_2$  (10 mmol, 0.70 g/4 mL  $\text{H}_2\text{O}$ ),

maintaining the temperature under 5 °C and under stirring for 20 minutes. Then, a solution of SnCl<sub>2</sub> (28 mmol, 6.4 g/10 mL of HCl 12M) was slowly added, and the suspension was maintained under stirring for 50 minutes. Finally, the pale yellow precipitate was filtered and washed with HCl 12M. Recrystallization solvent: ethanol; yield 97%; mp 174-175 °C. TLC: toluene/ethyl acetate/methanol 8:2:1.5 v/v/v; <sup>1</sup>H-NMR (400 MHz, DMSO-d<sub>6</sub>) δ 9.63 (bs, 2H, NH<sub>2</sub>, exch.); 8.32 (s, 1H, NH, exch.); 7.83 (d, 1H, H-5, *J* = 5.6 Hz); 7.05 (d, 1H, H-4, *J* = 5.6 Hz); 3.76 (s, 3H, CH<sub>3</sub>). Anal. C<sub>6</sub>H<sub>8</sub>N<sub>2</sub>O<sub>2</sub>SCl (C, H, N). (The hydrazine was obtained by a different synthetic route than the one reported in ref [14] in the main manuscript, but the melting point is comparable to ref [14]).

[14] Huddleston, P.R.; Barker, J.M.; Adamczewska, Y. Preparation and reactions of some 3-hydrazino-2-methoxycarbonylthiophene. *J. Chem. Res.* **1980**, 238-239.

<sup>1</sup>H NMR Compound 3  
DMSO

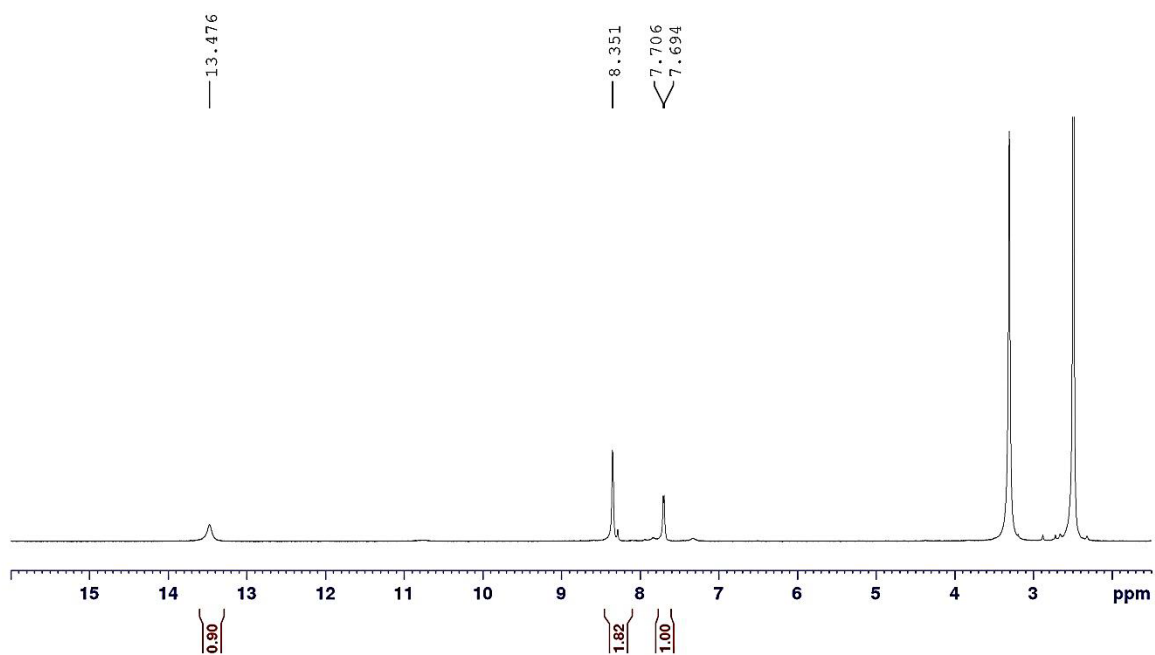

<sup>1</sup>H NMR Compound 3  
DMSO + D<sub>2</sub>O

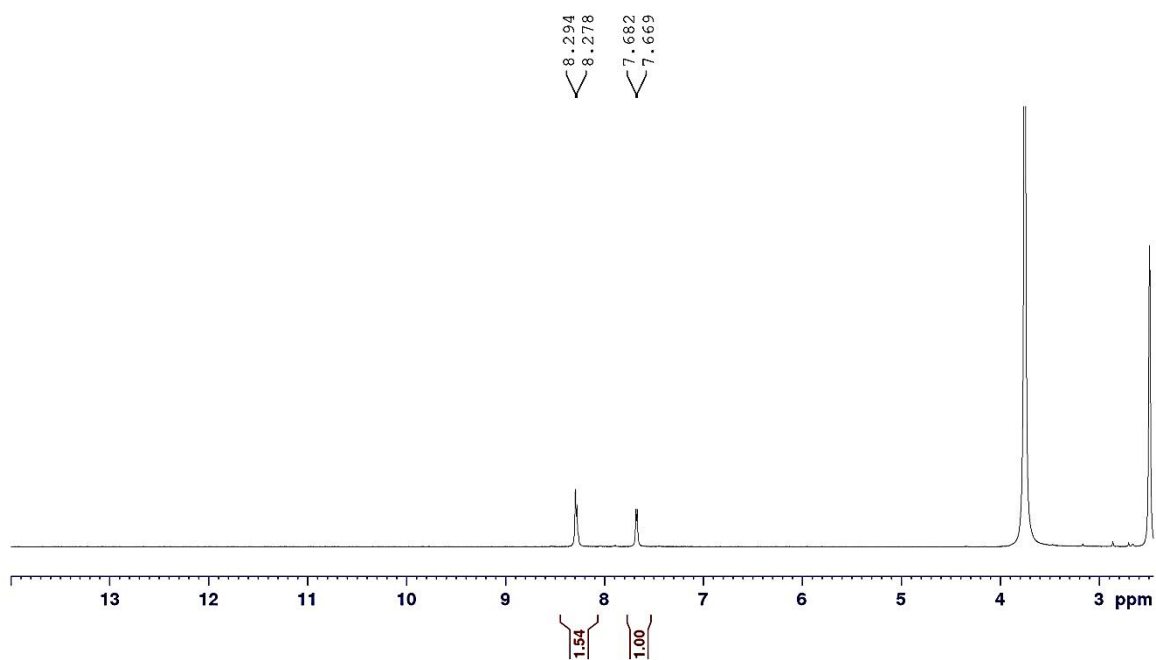

<sup>1</sup>H NMR Compound 4  
DMSO

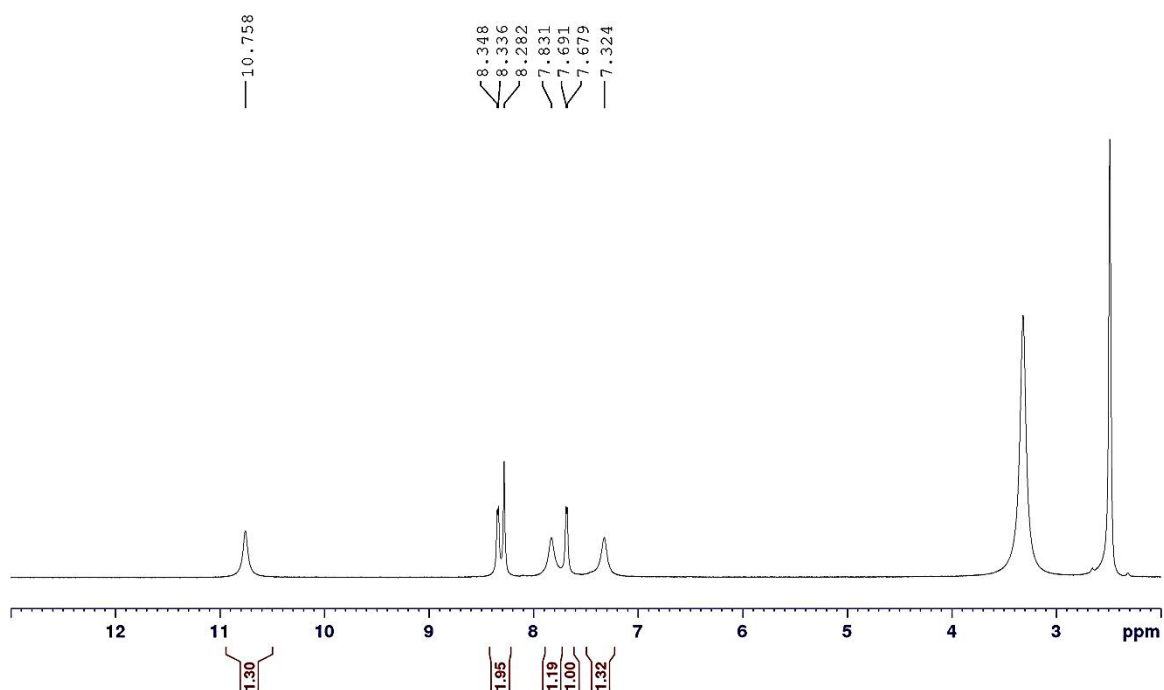

<sup>1</sup>H NMR Compound 4  
DMSO + D<sub>2</sub>O

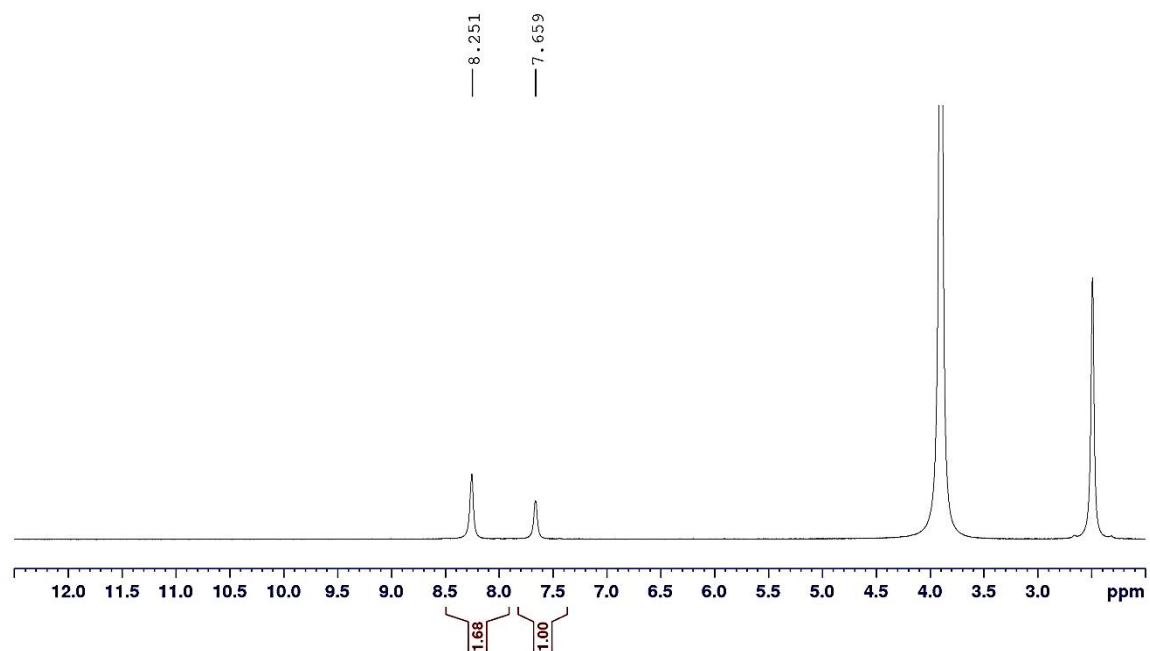

<sup>1</sup>H NMR Compound 5  
CDCl<sub>3</sub>

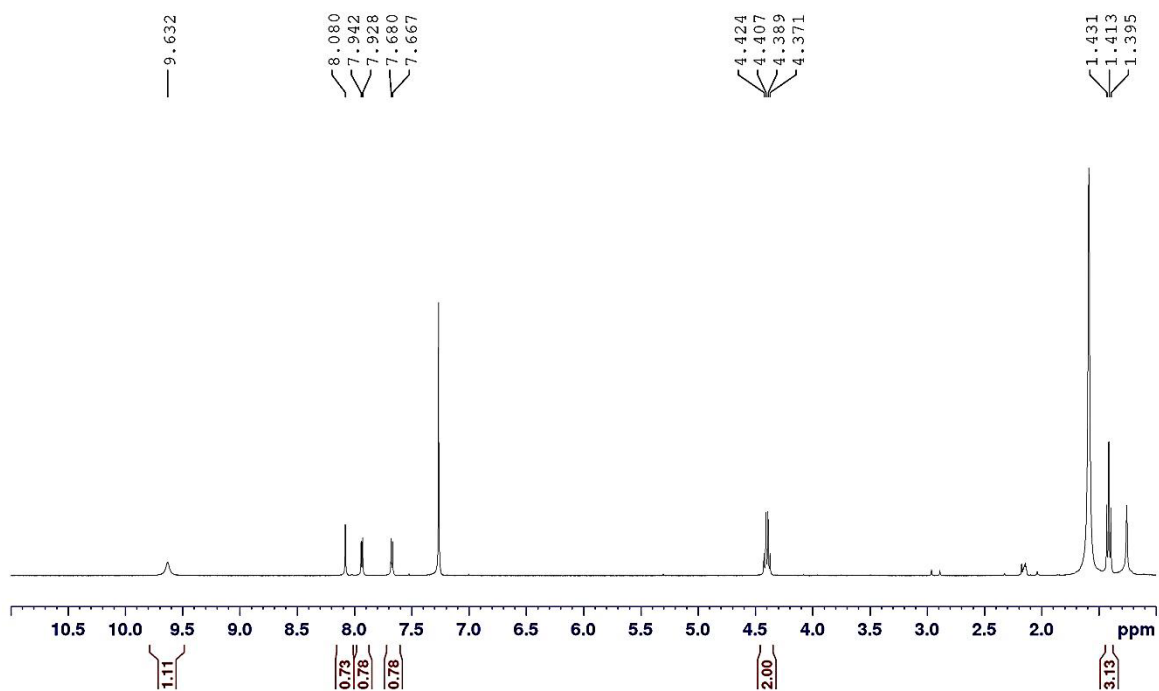

<sup>1</sup>H NMR Compound 6  
DMSO

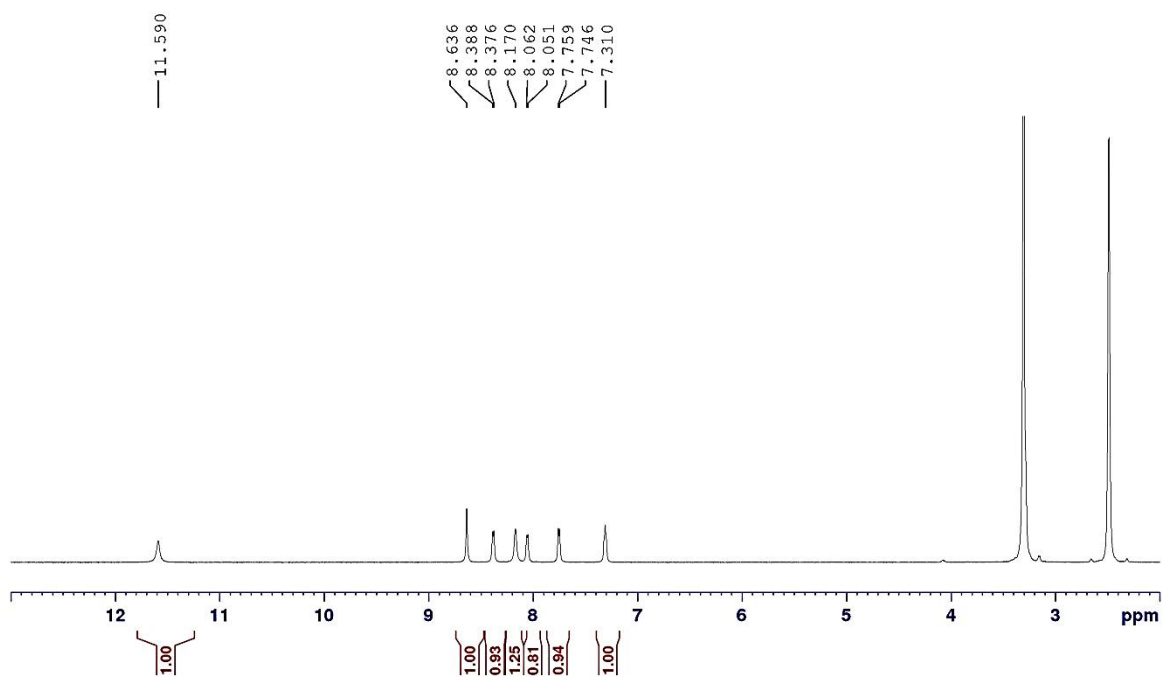

<sup>1</sup>H NMR Compound 7  
DMSO

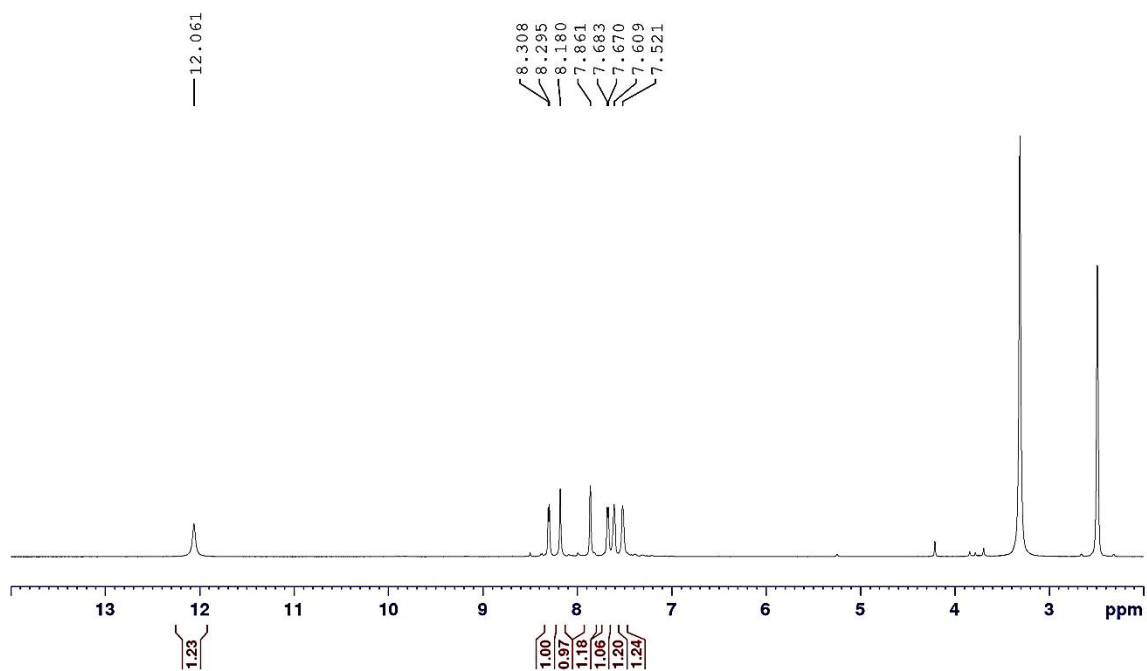

<sup>1</sup>H NMR Compound 8  
DMSO

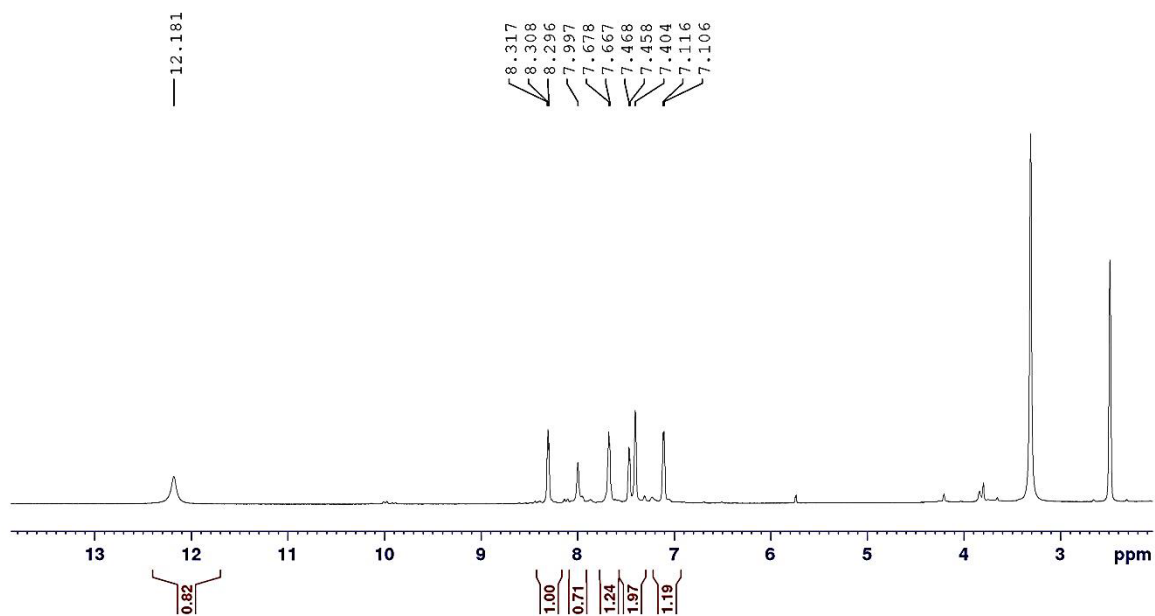

<sup>1</sup>H Compound 9c  
CDCl<sub>3</sub>

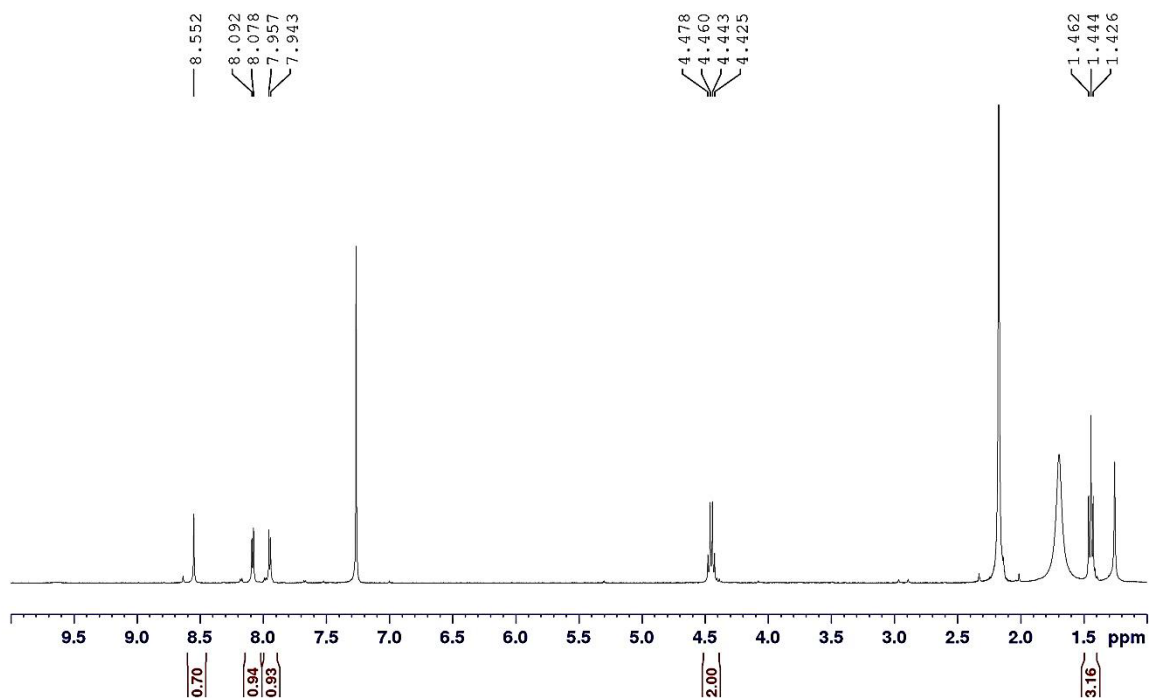

<sup>1</sup>H NMR Compound 9d  
DMSO

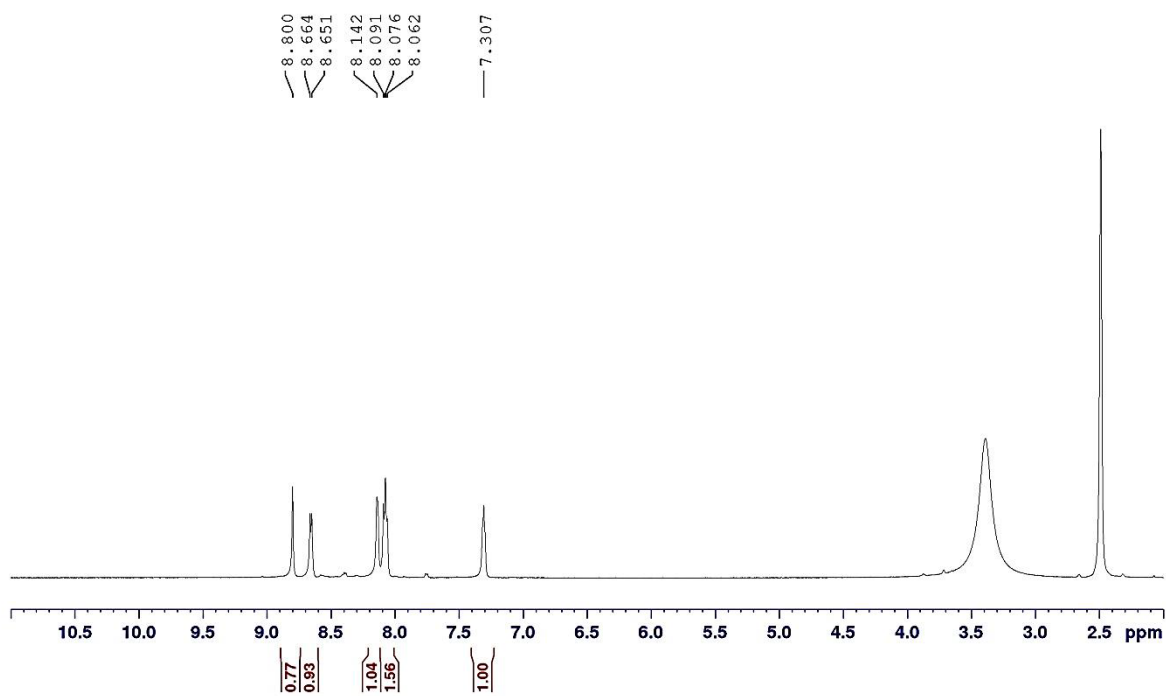



<sup>1</sup>H NMR Compound 10c  
DMSO

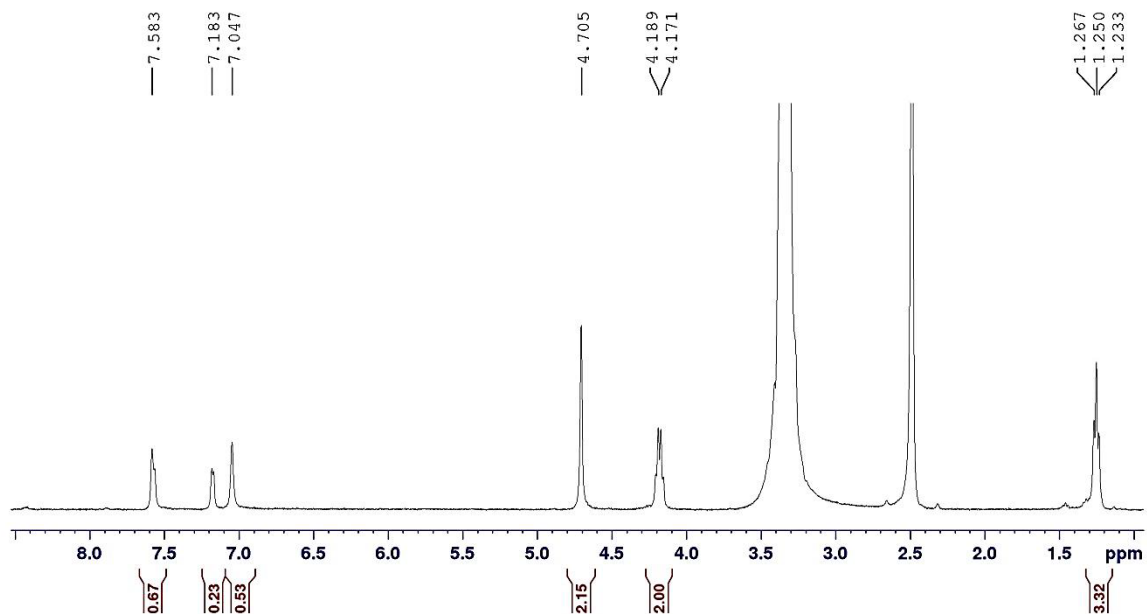

<sup>1</sup>H NMR Compound 10d  
DMSO

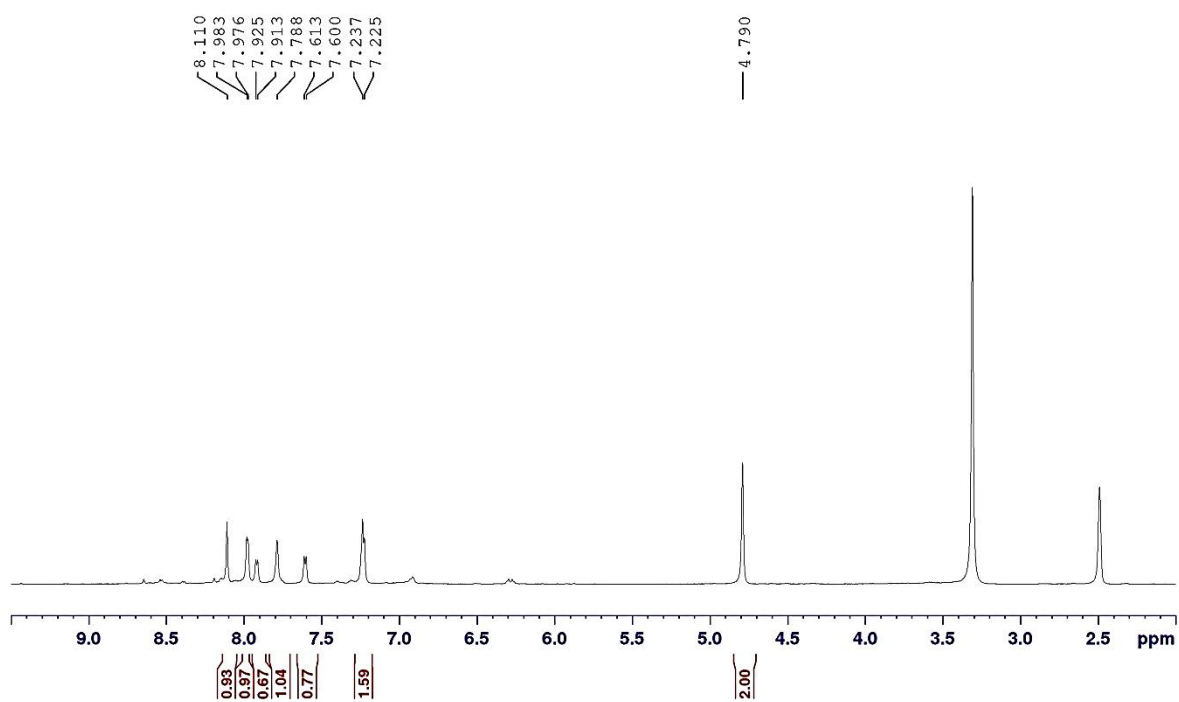

<sup>1</sup>H NMR Compound 10d  
DMSO + D<sub>2</sub>O

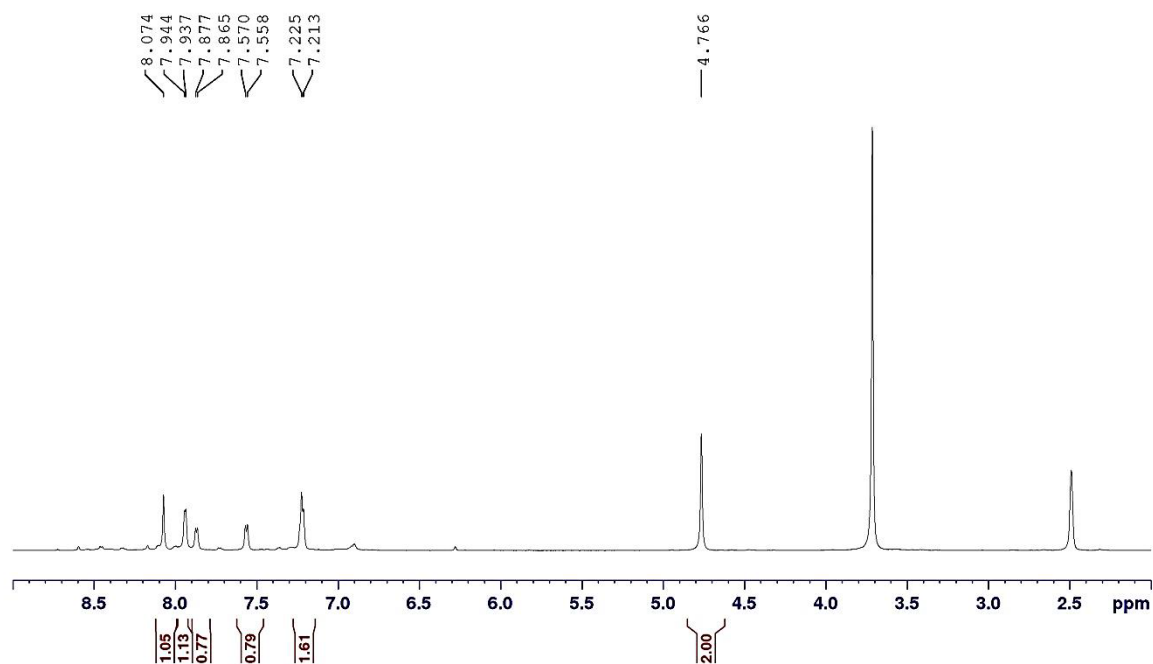

<sup>1</sup>H NMR Compound 11c  
DMSO

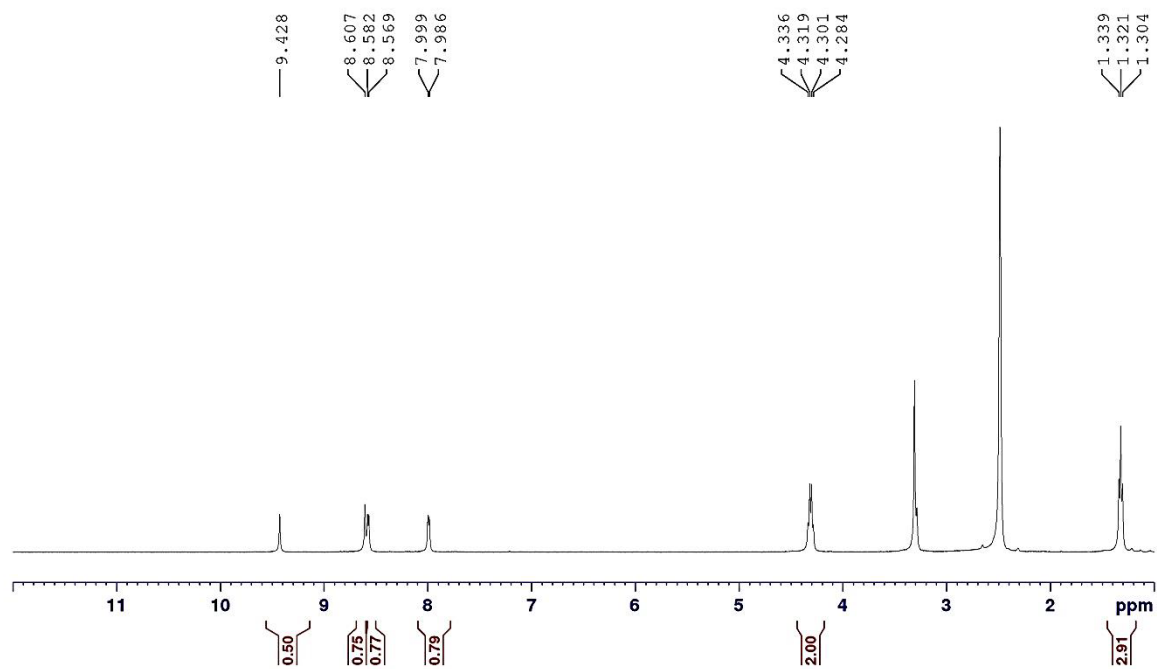

<sup>1</sup>H NMR Compound 11d  
DMSO

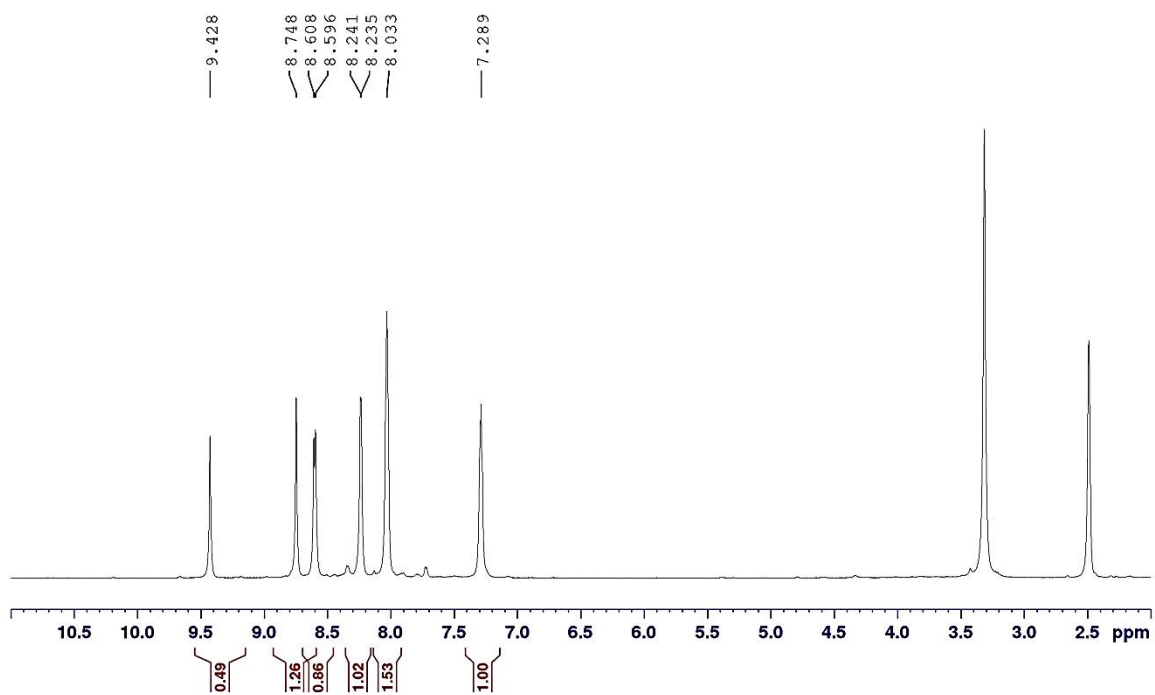

<sup>1</sup>H NMR Compound 11e  
DMSO

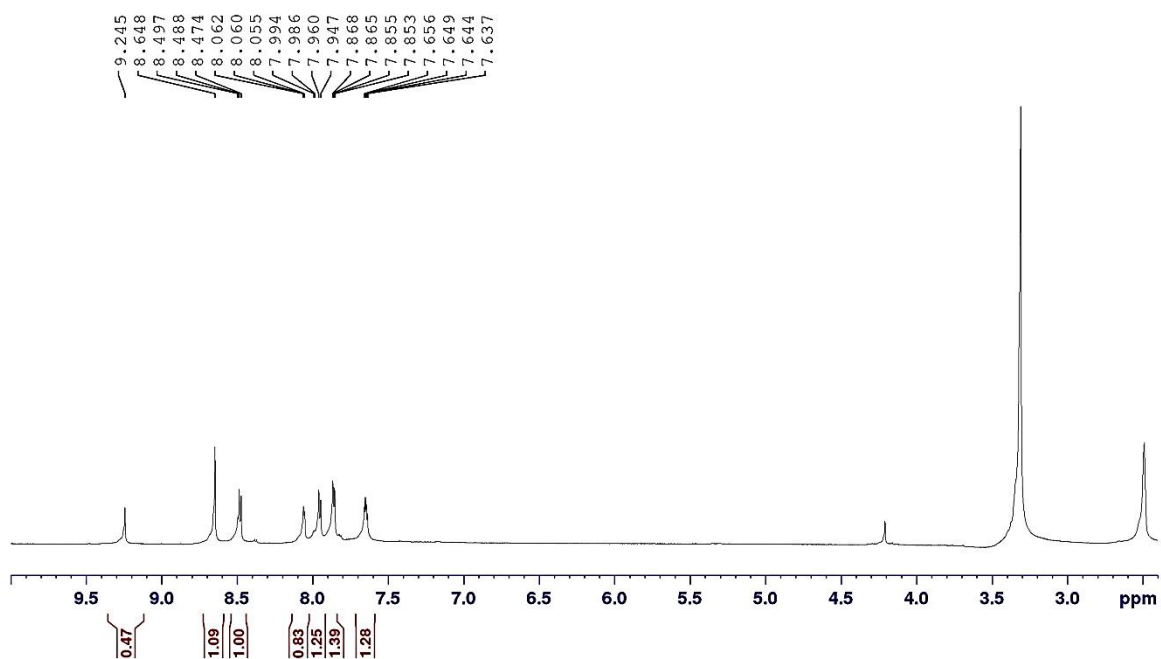

<sup>1</sup>H NMR Compound 12a  
DMSO

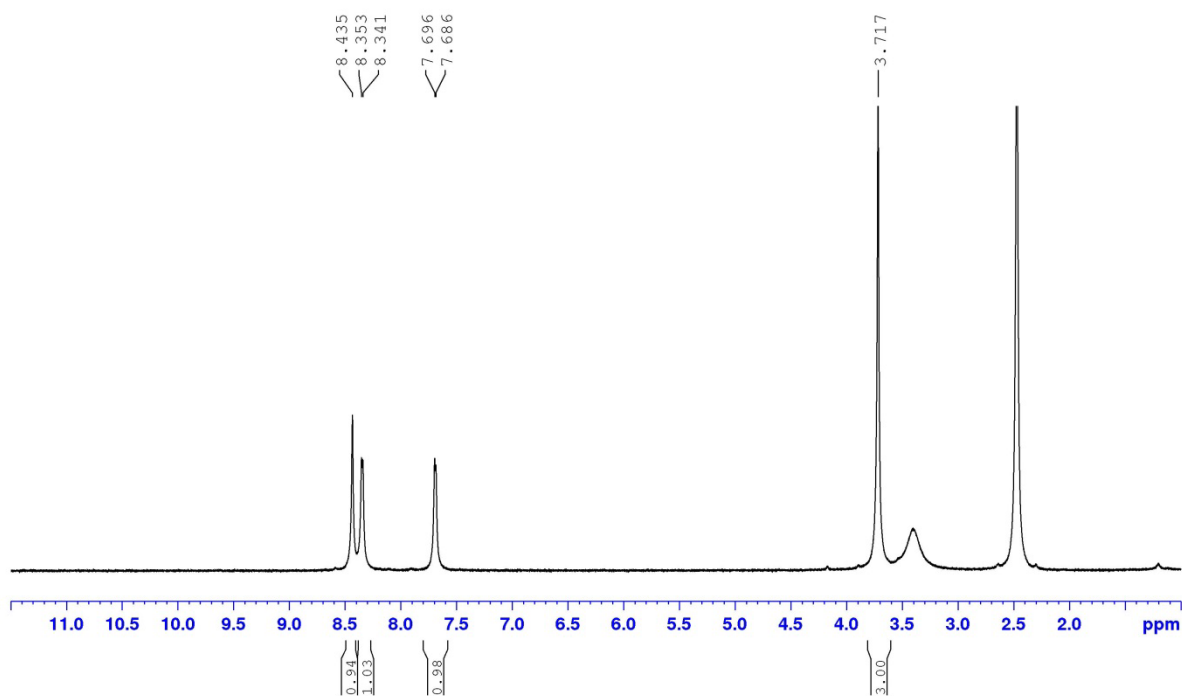

<sup>1</sup>H NMR Compound 12b  
DMSO

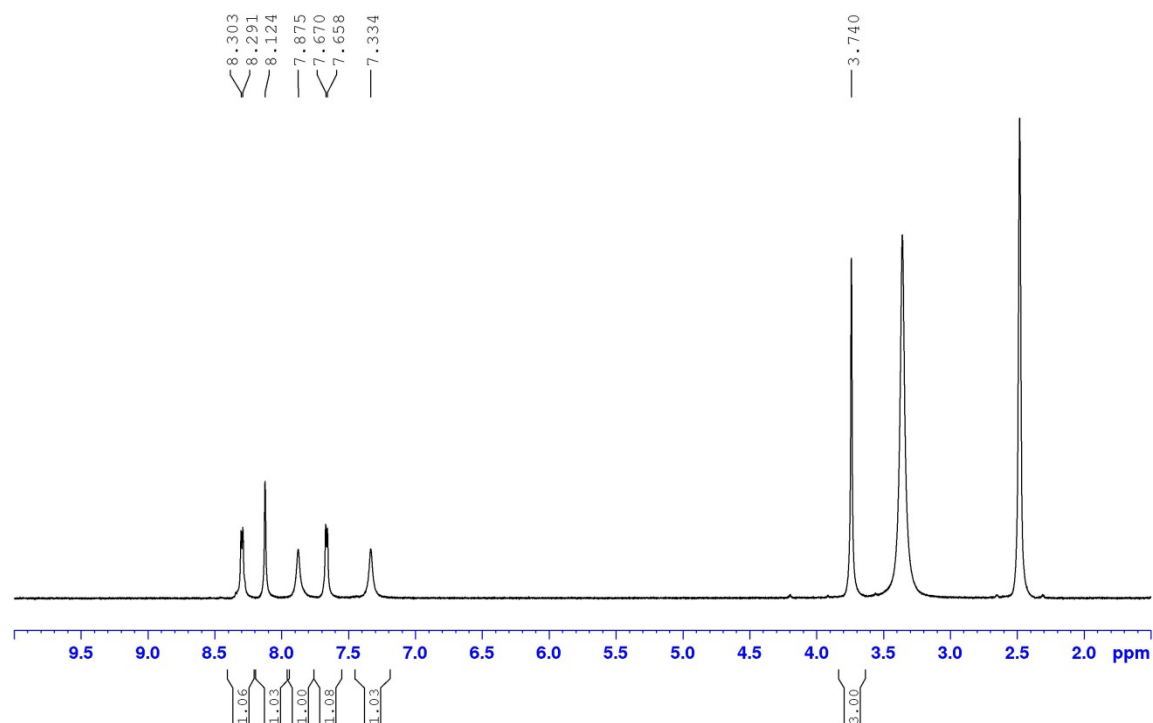

<sup>1</sup>H NMR Compound 12c  
DMSO

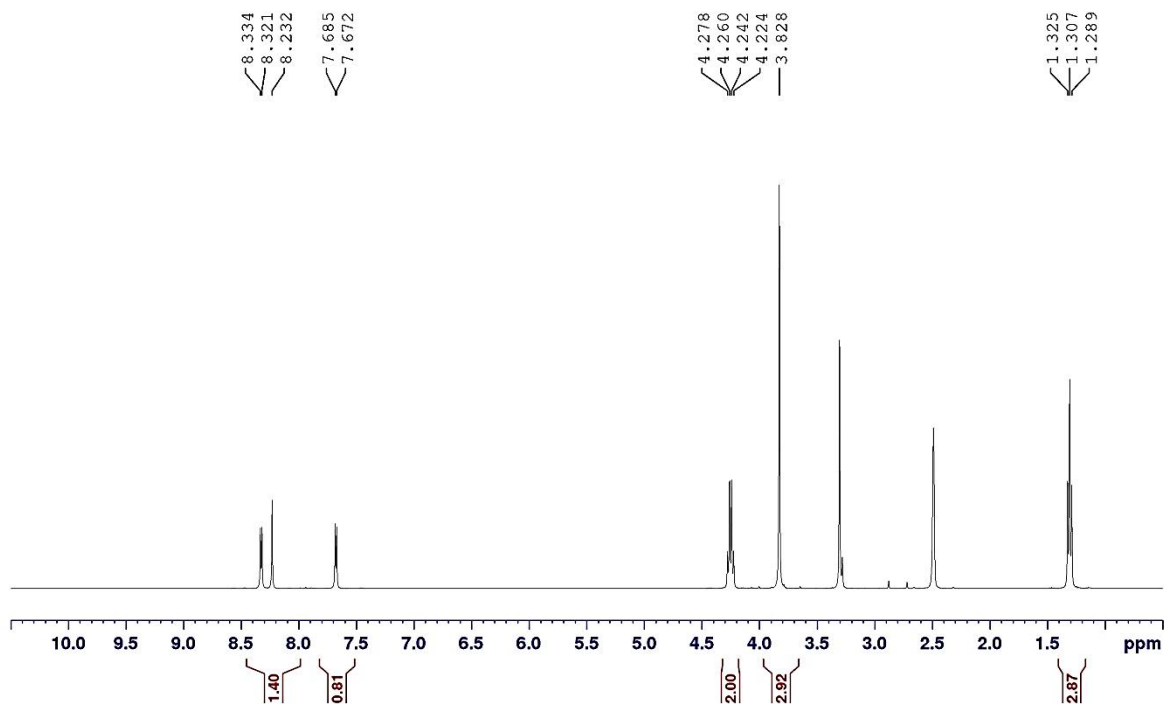

<sup>1</sup>H NMR Compound 12d  
DMSO

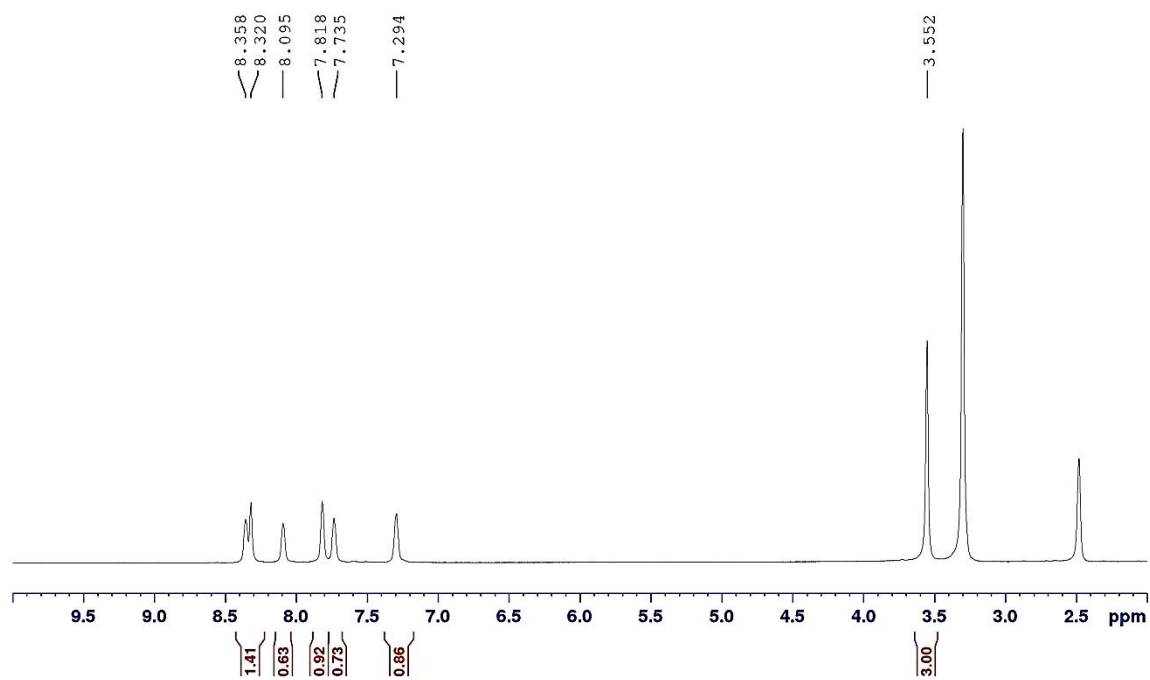

<sup>1</sup>H NMR Compound 12e  
CDCl<sub>3</sub>

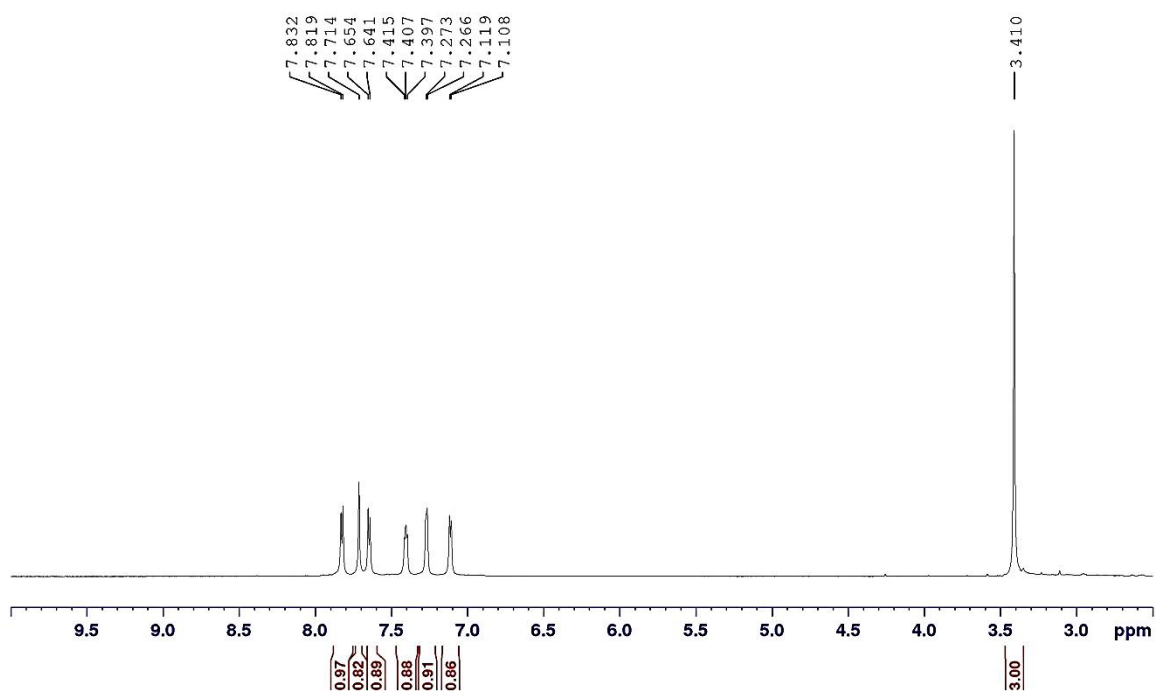

<sup>1</sup>H NMR Compound 12f  
DMSO

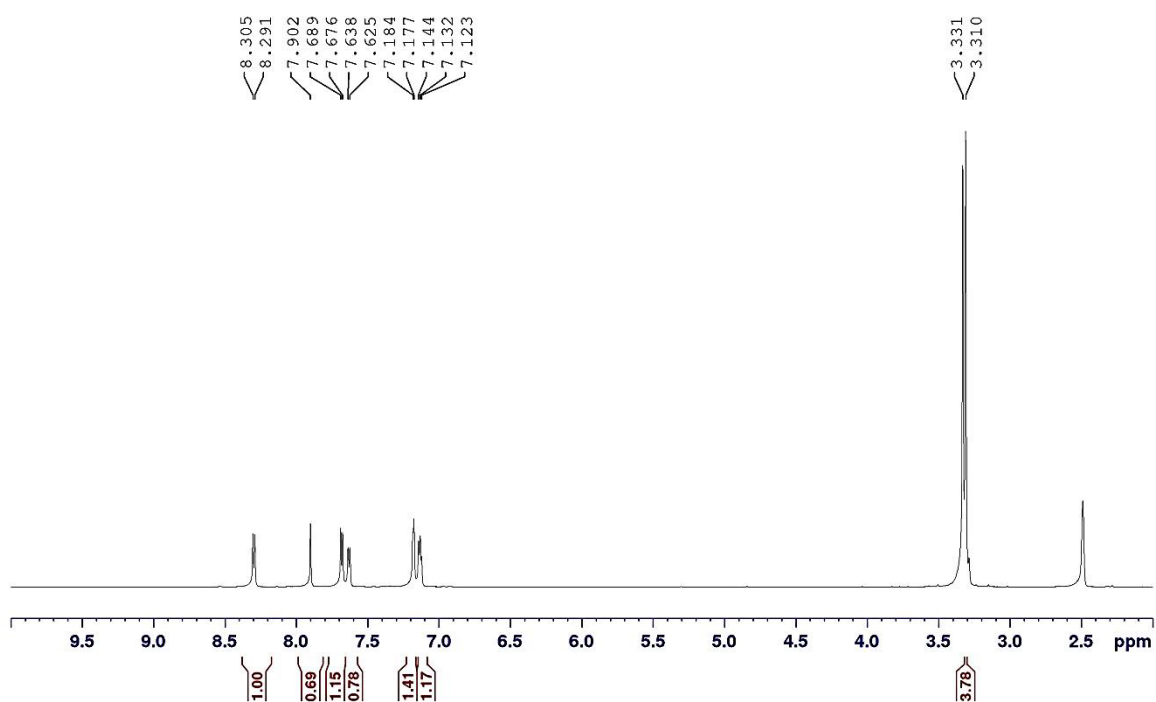

<sup>1</sup>H NMR Compound 13b  
DMSO

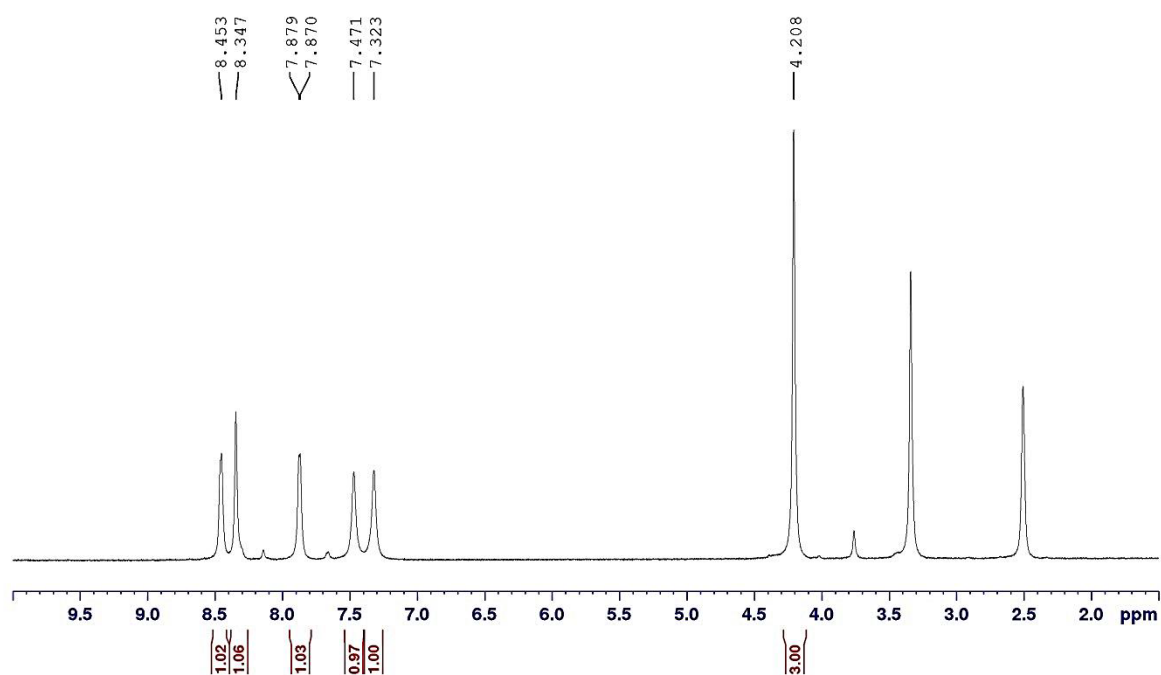

<sup>1</sup>H NMR Compound 13e  
DMSO

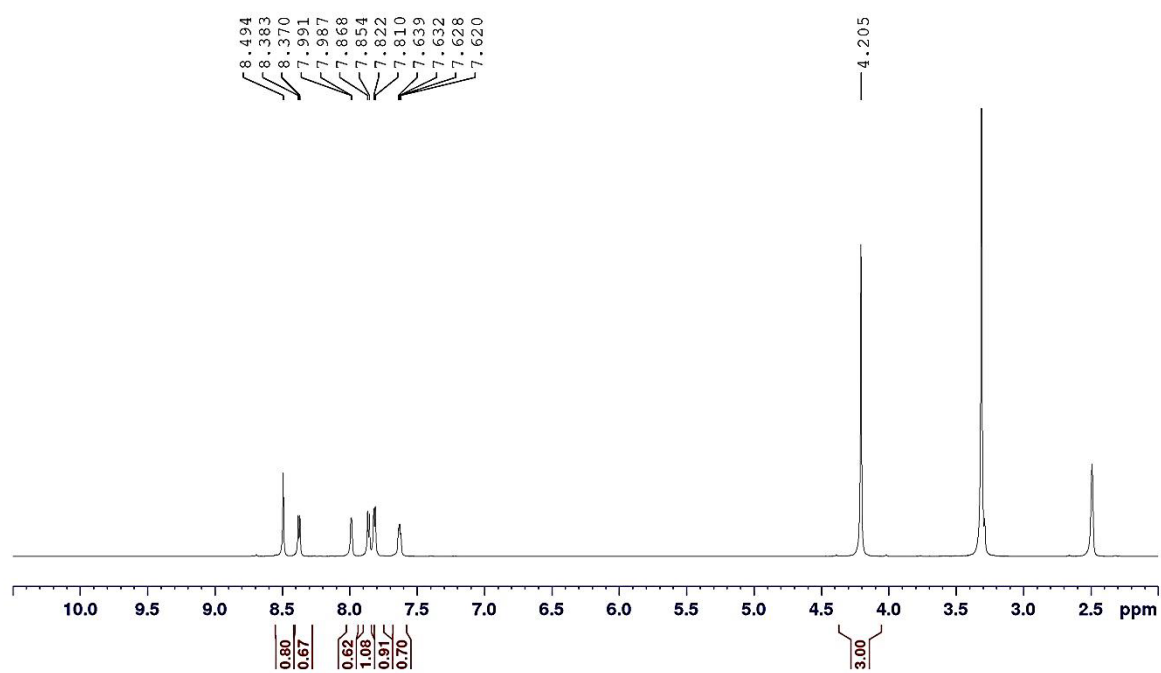

<sup>1</sup>H NMR Compound 13f  
DMSO

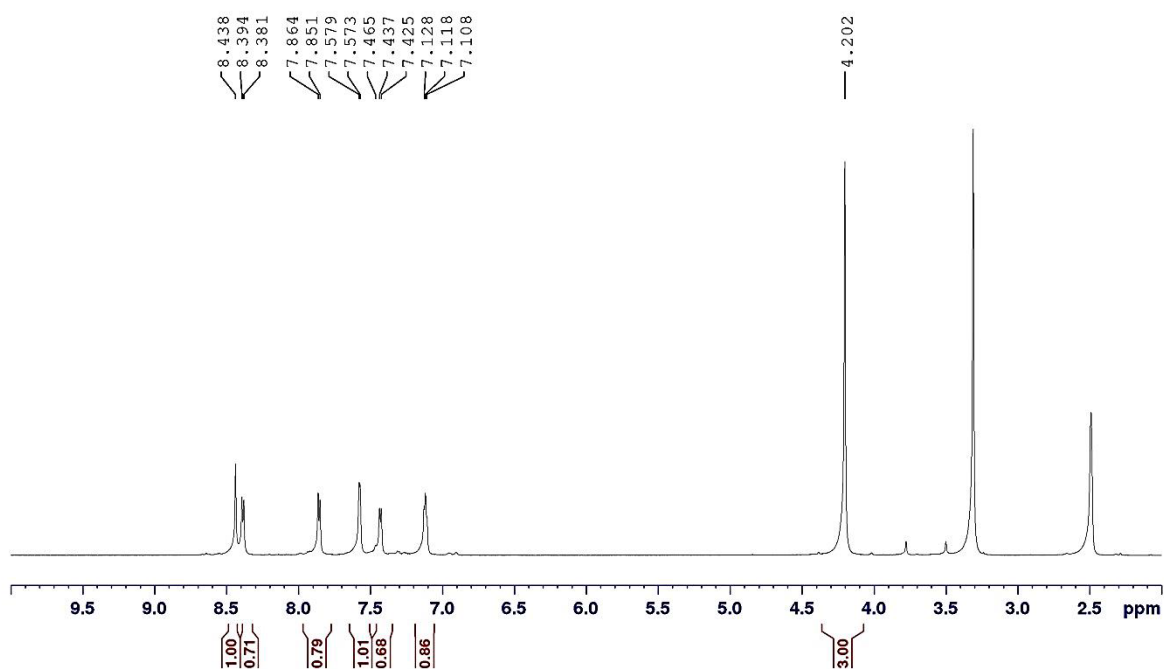

<sup>1</sup>H NMR Compound 14  
DMSO

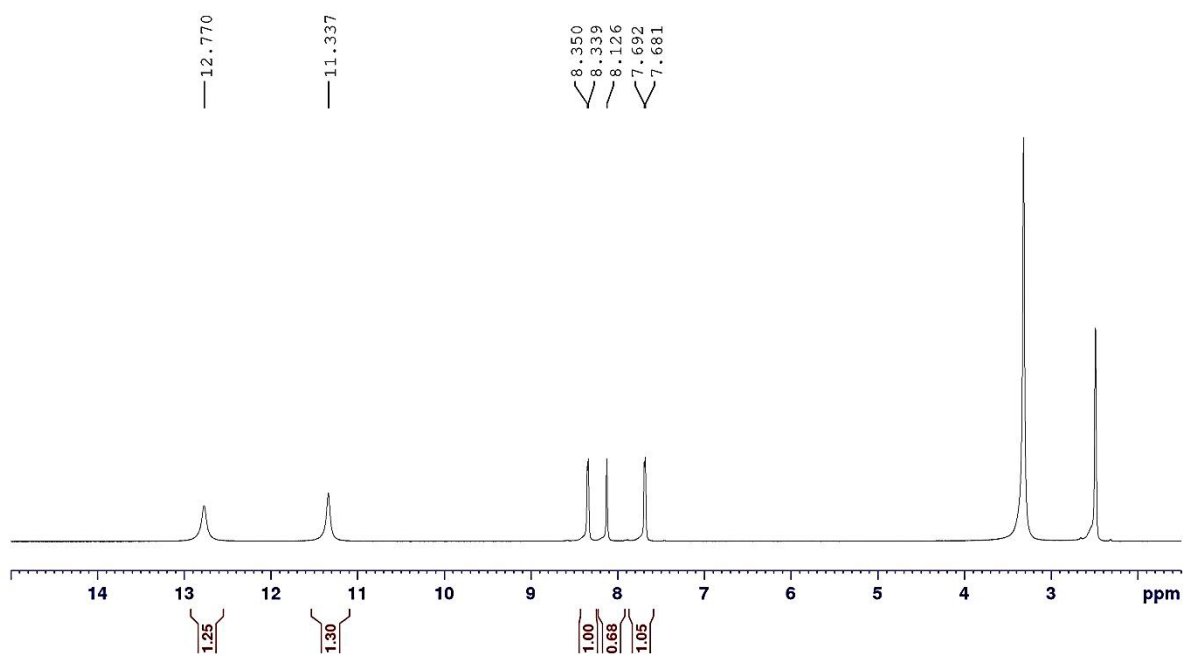



<sup>1</sup>H NMR Compound 14  
DMSO + D<sub>2</sub>O

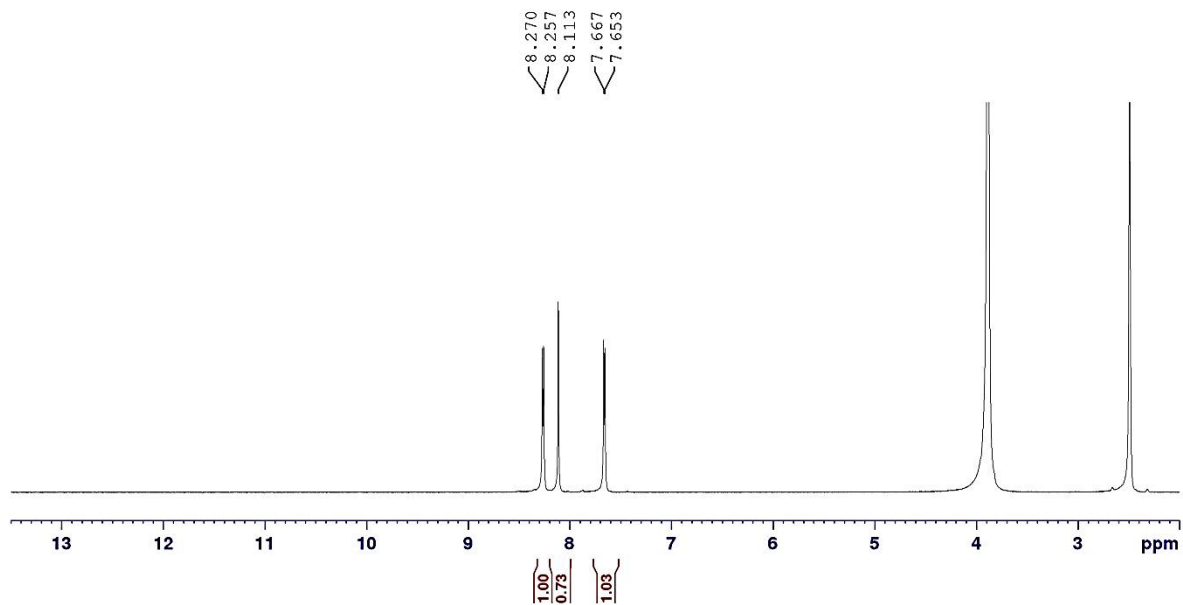

<sup>1</sup>H NMR Compound 15  
DMSO

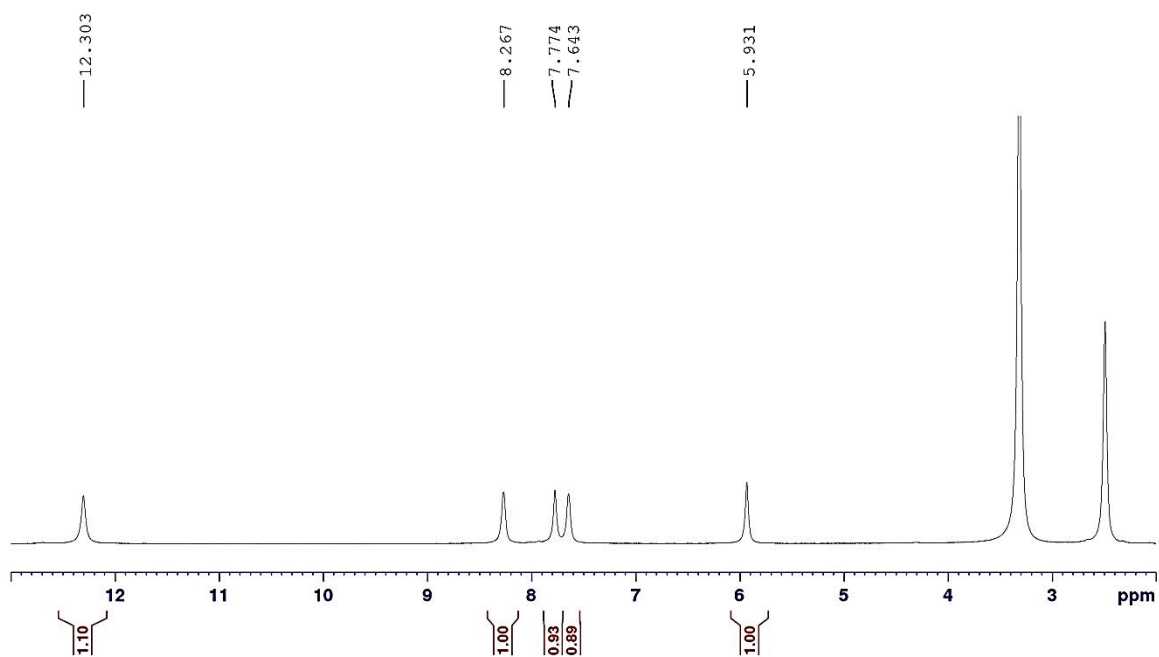

<sup>1</sup>H NMR Compound 15  
DMSO + D<sub>2</sub>O

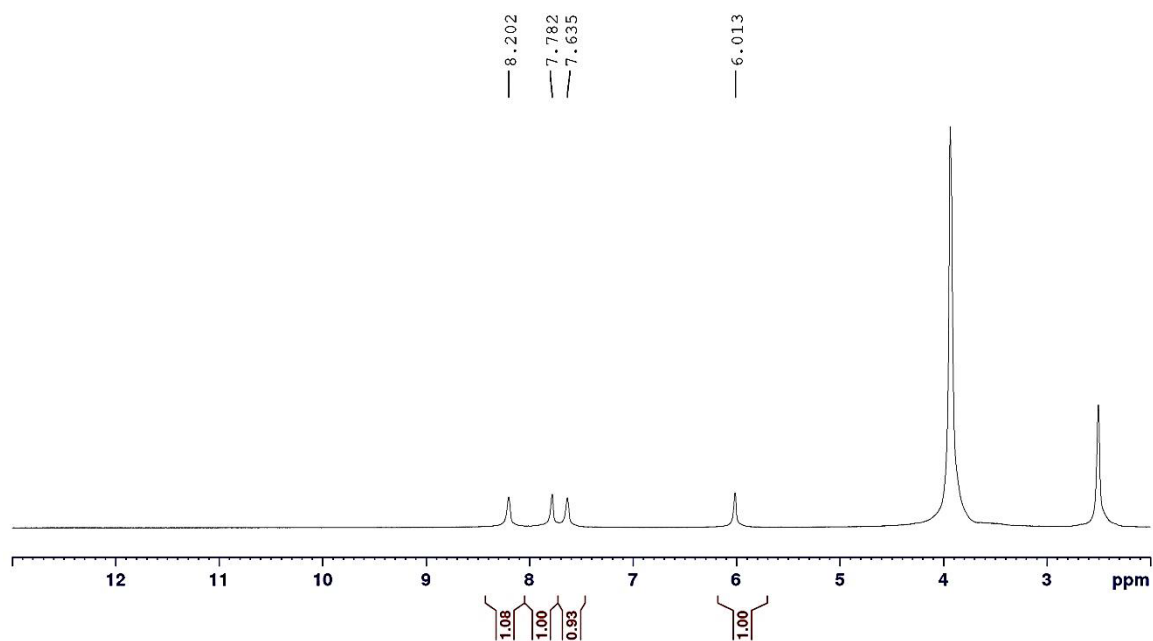

<sup>1</sup>H NMR Compound 16  
CDCl<sub>3</sub>

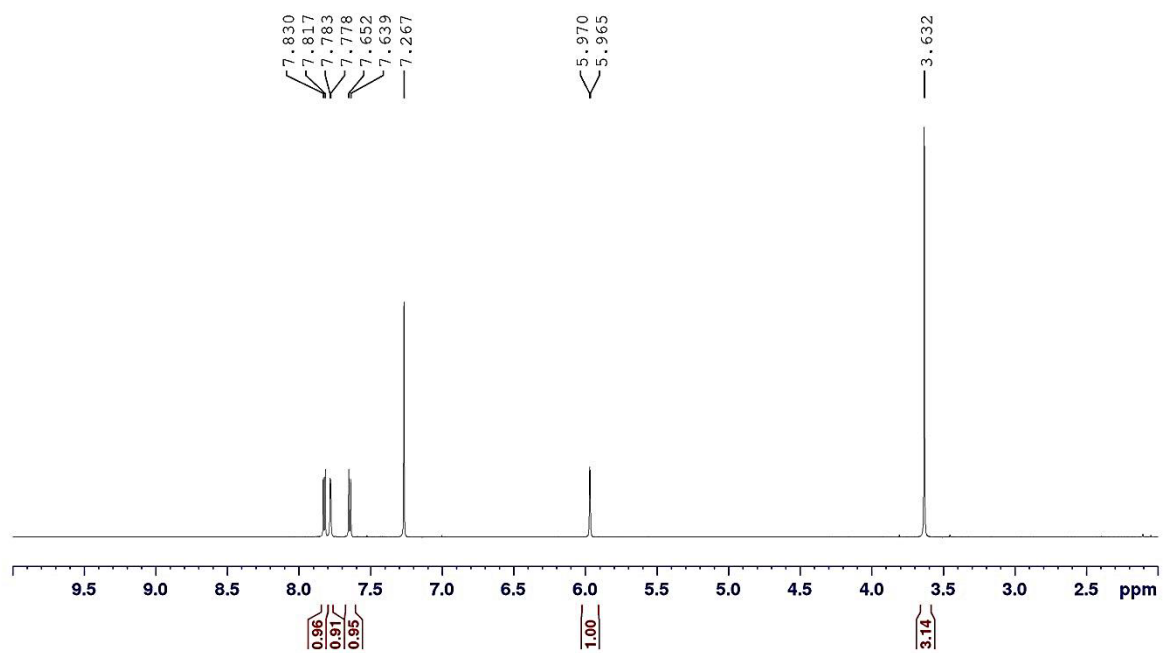

<sup>1</sup>H NMR Compound 17  
DMSO

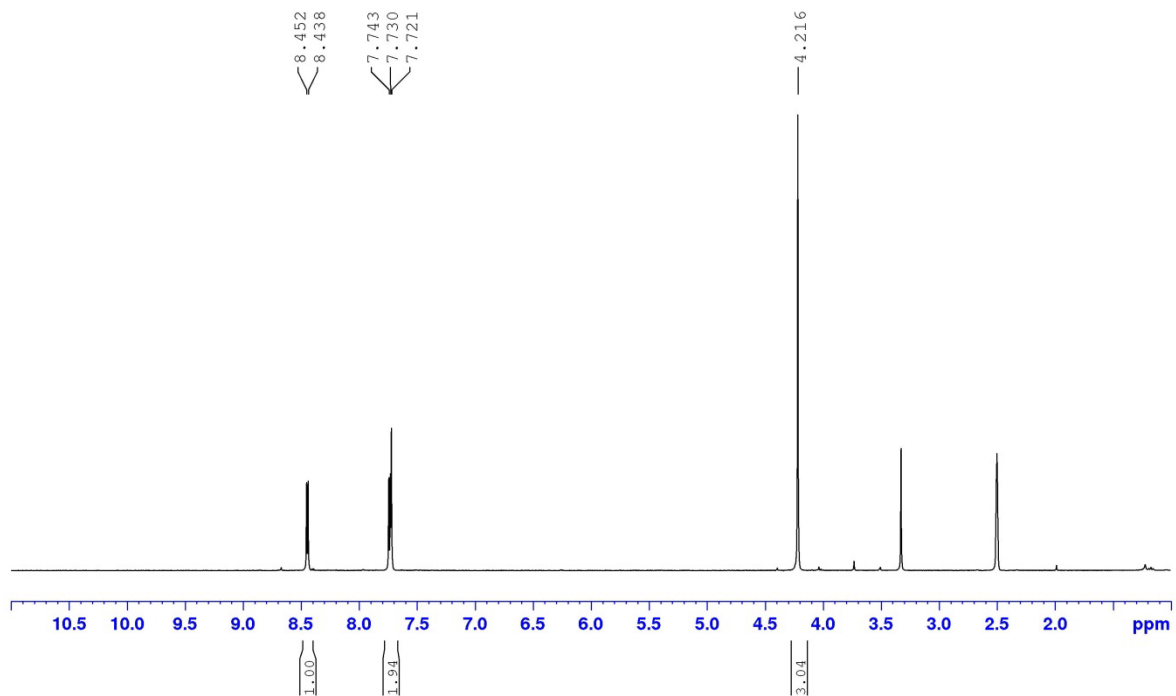

<sup>1</sup>H NMR Compound 19  
DMSO

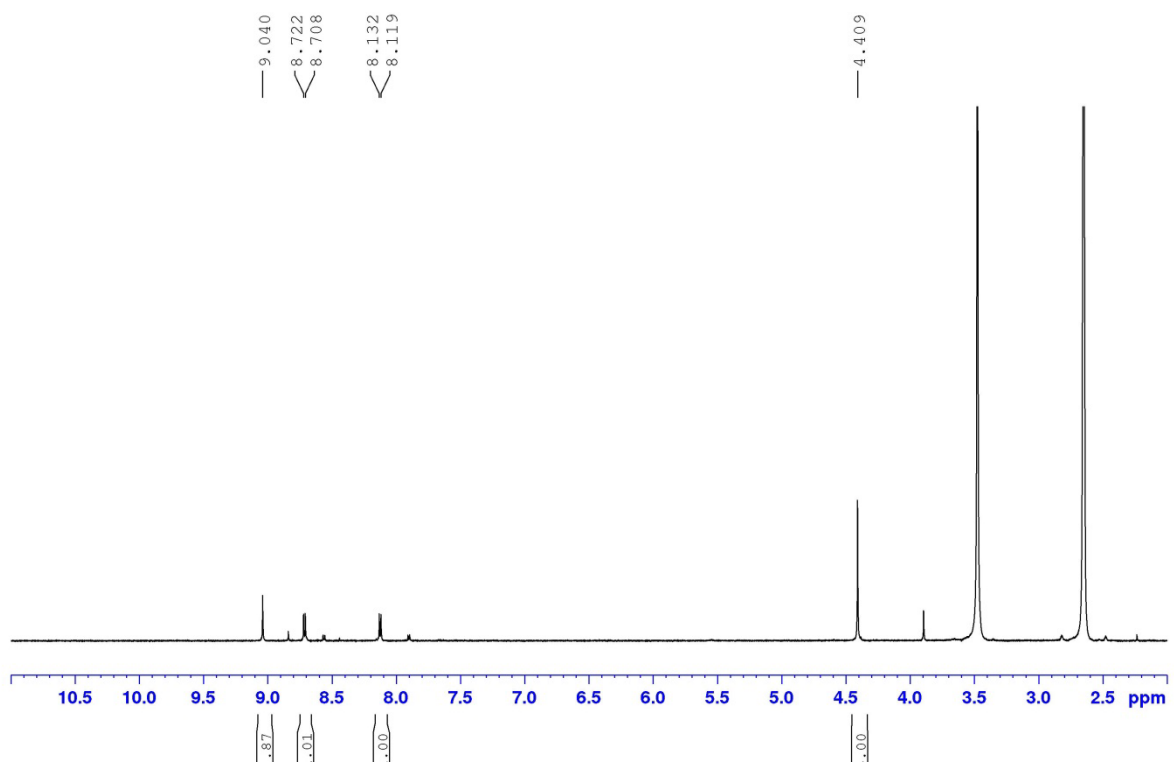

<sup>1</sup>H NMR Compound 20  
CDCl<sub>3</sub>

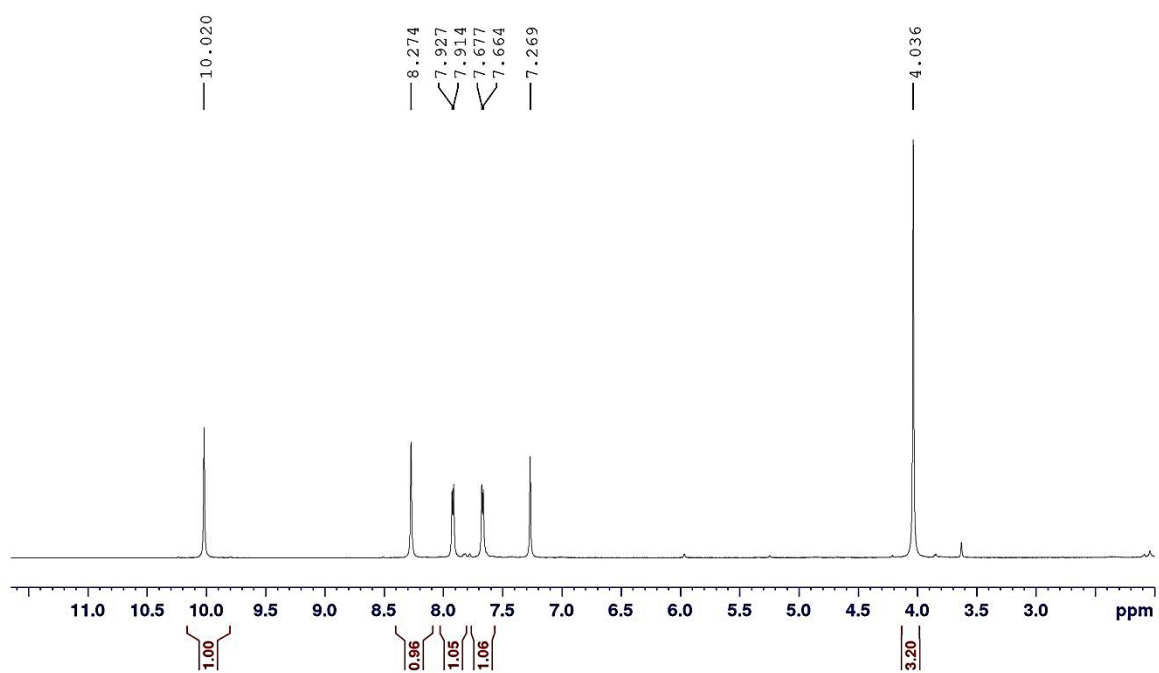

<sup>1</sup>H NMR Compound 21  
DMSO

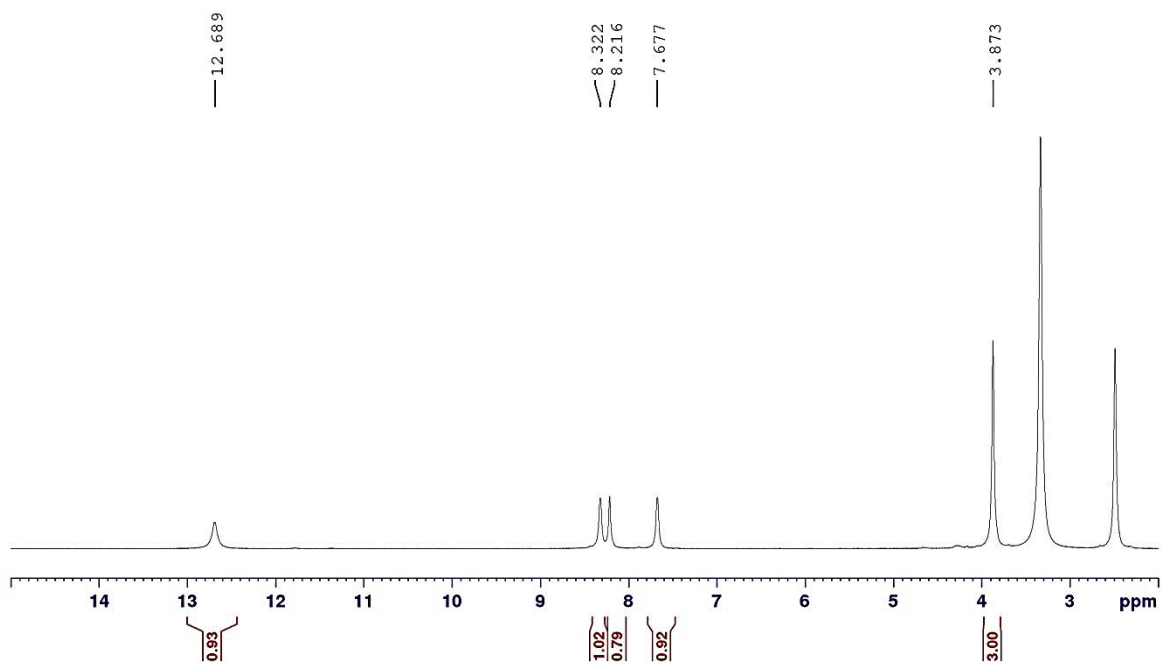

<sup>1</sup>H NMR Compound 21  
DMSO + D<sub>2</sub>O

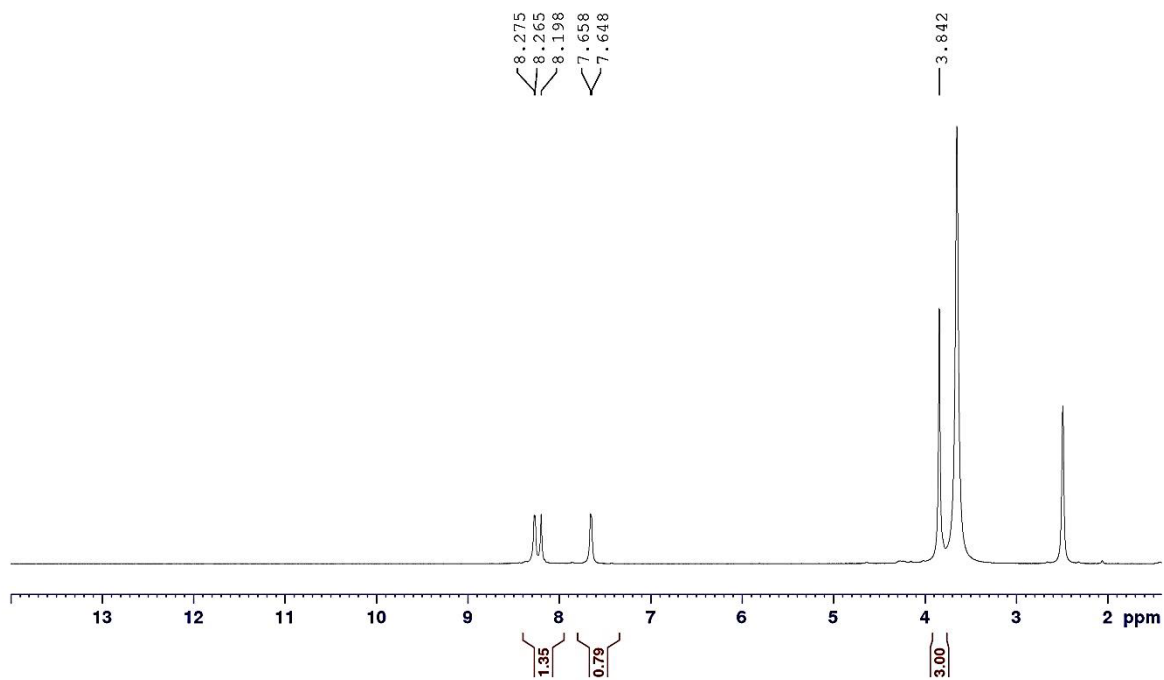

<sup>1</sup>H NMR Compound 22a  
CDCl<sub>3</sub>

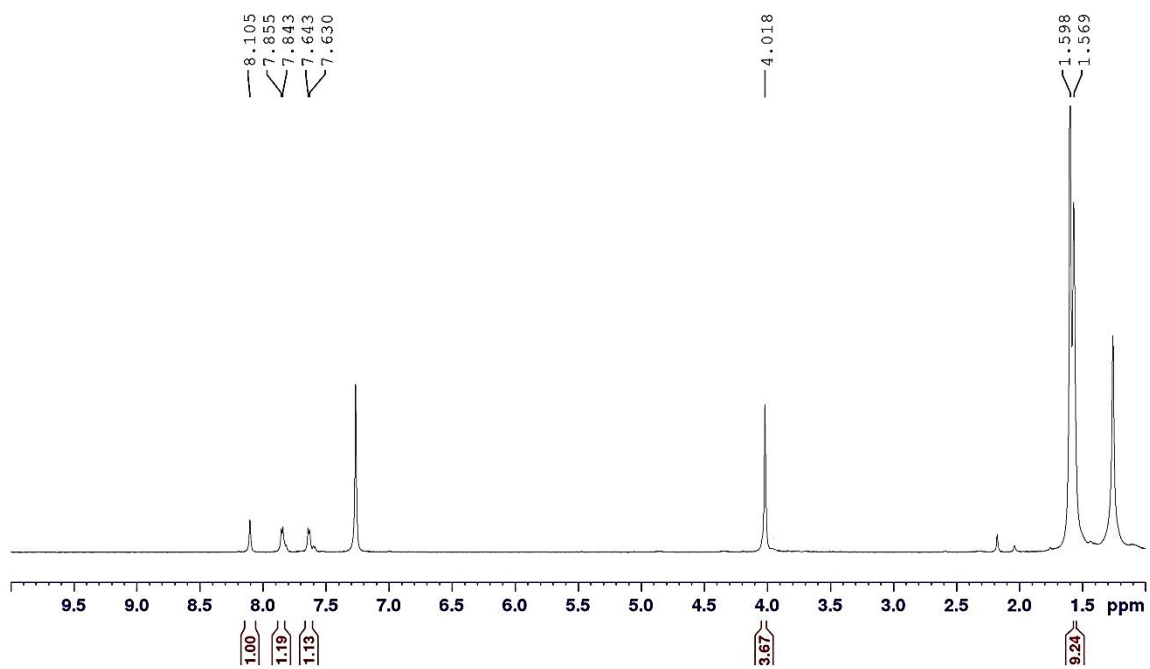

<sup>1</sup>H NMR Compound 22b  
CDCl<sub>3</sub>

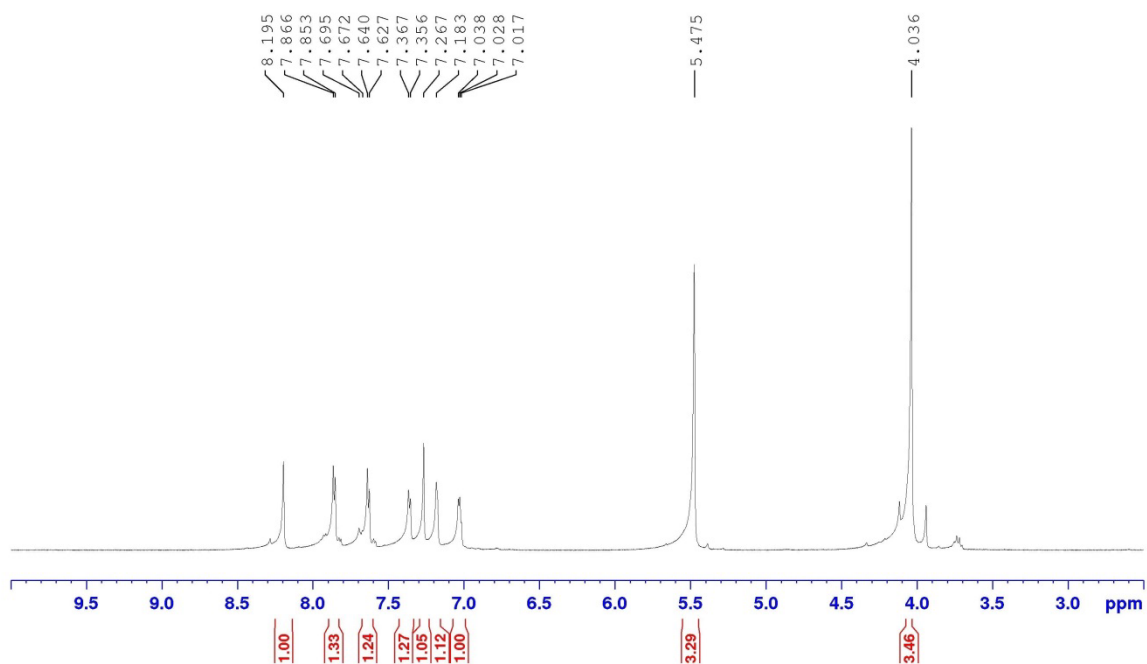

<sup>1</sup>H NMR Compound 23  
DMSO + D<sub>2</sub>O

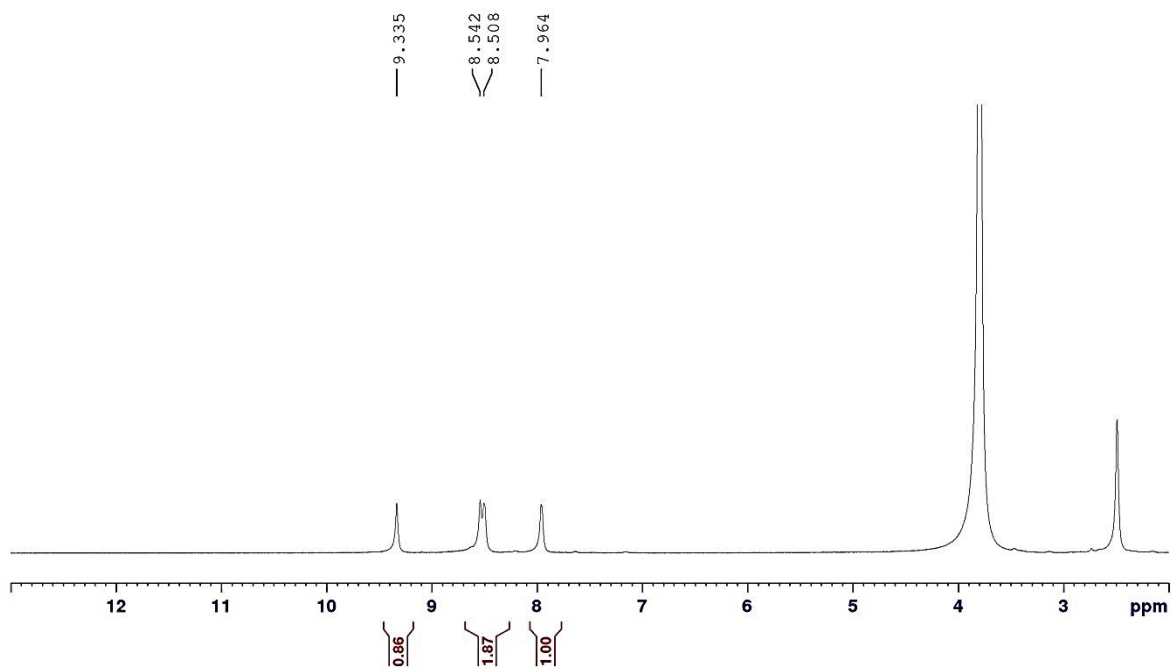

<sup>1</sup>H NMR Compound 24  
DMSO

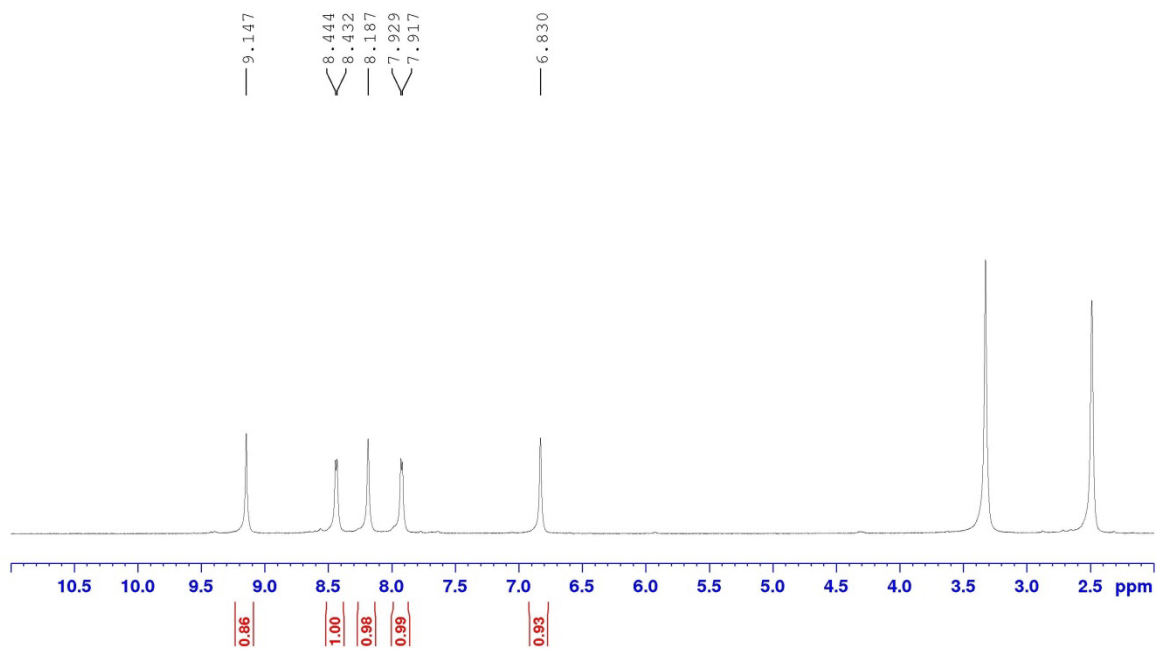

<sup>1</sup>H NMR Compound 25  
DMSO

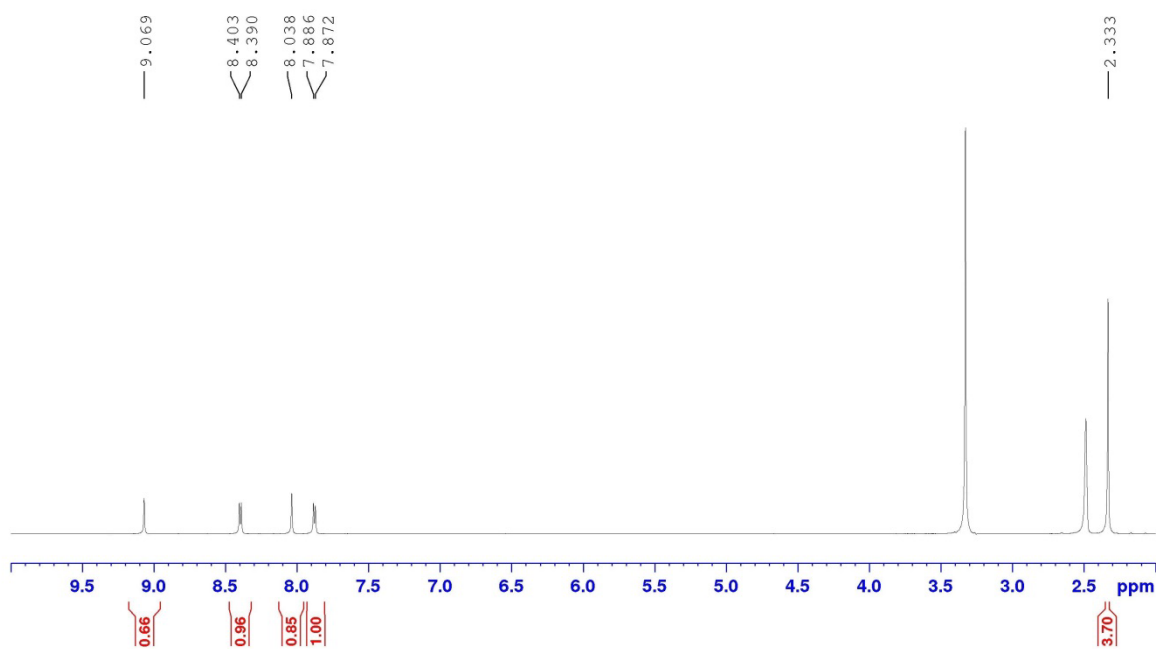

<sup>13</sup>C NMR Compound 6  
DMSO

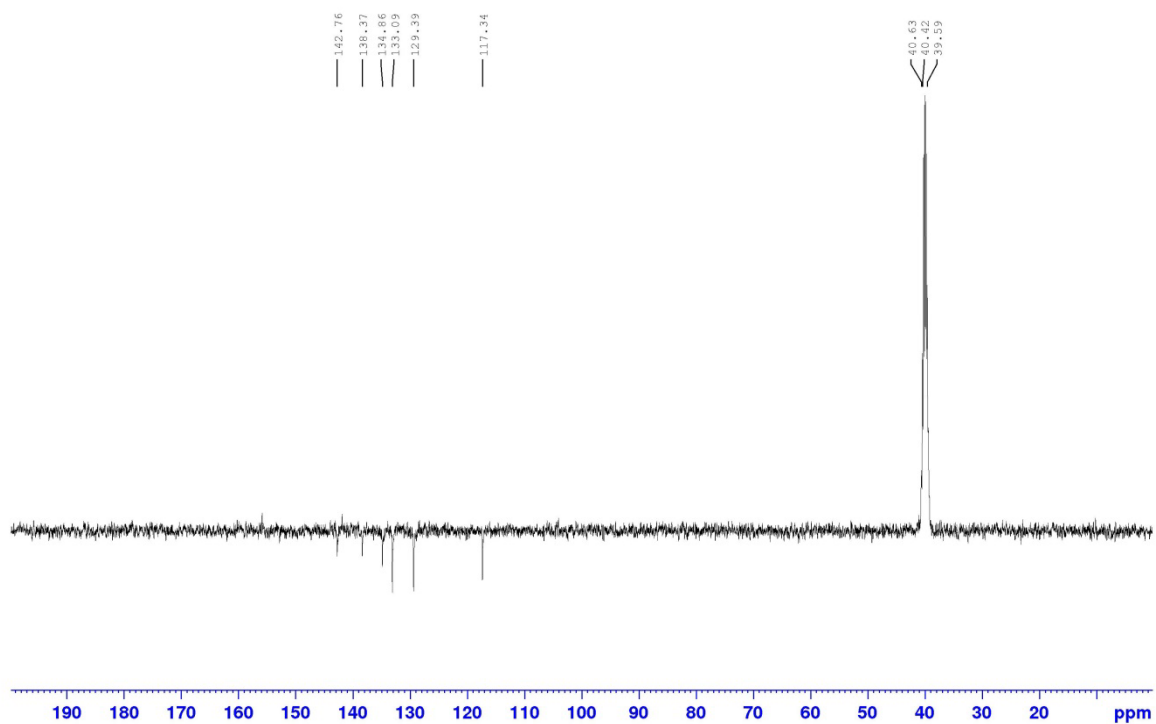

<sup>13</sup>C NMR Compound 8  
DMSO

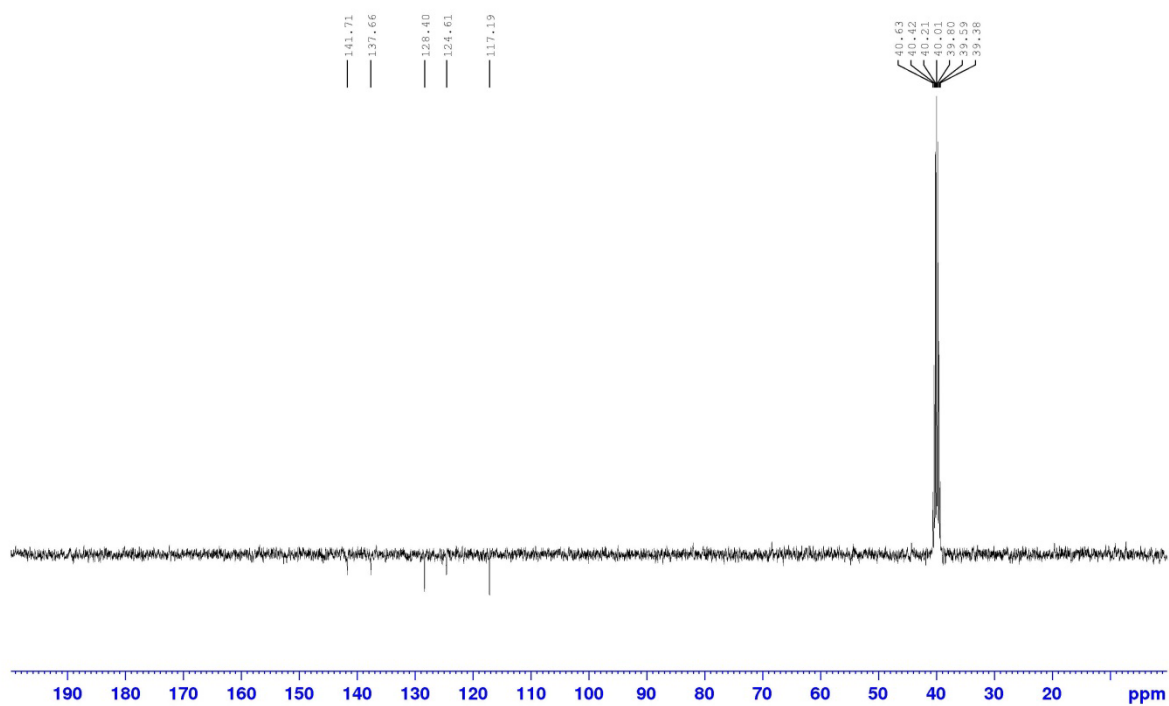



<sup>13</sup>C NMR Compound 10c  
DMSO

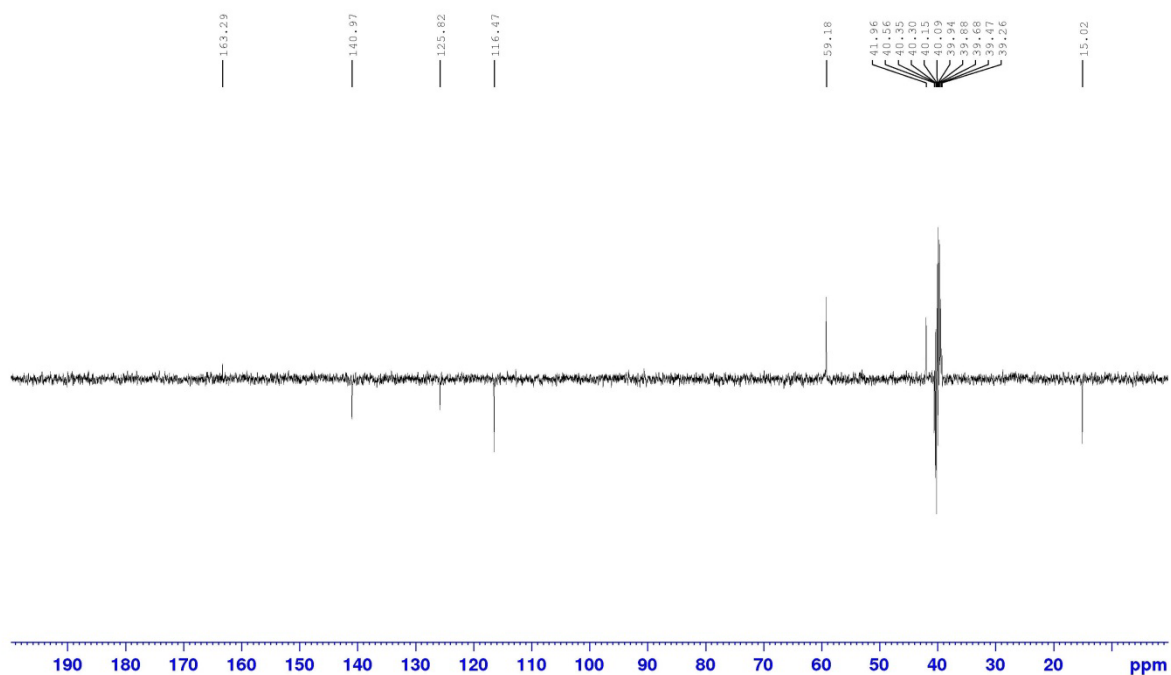

<sup>13</sup>C NMR Compound 11c  
DMSO

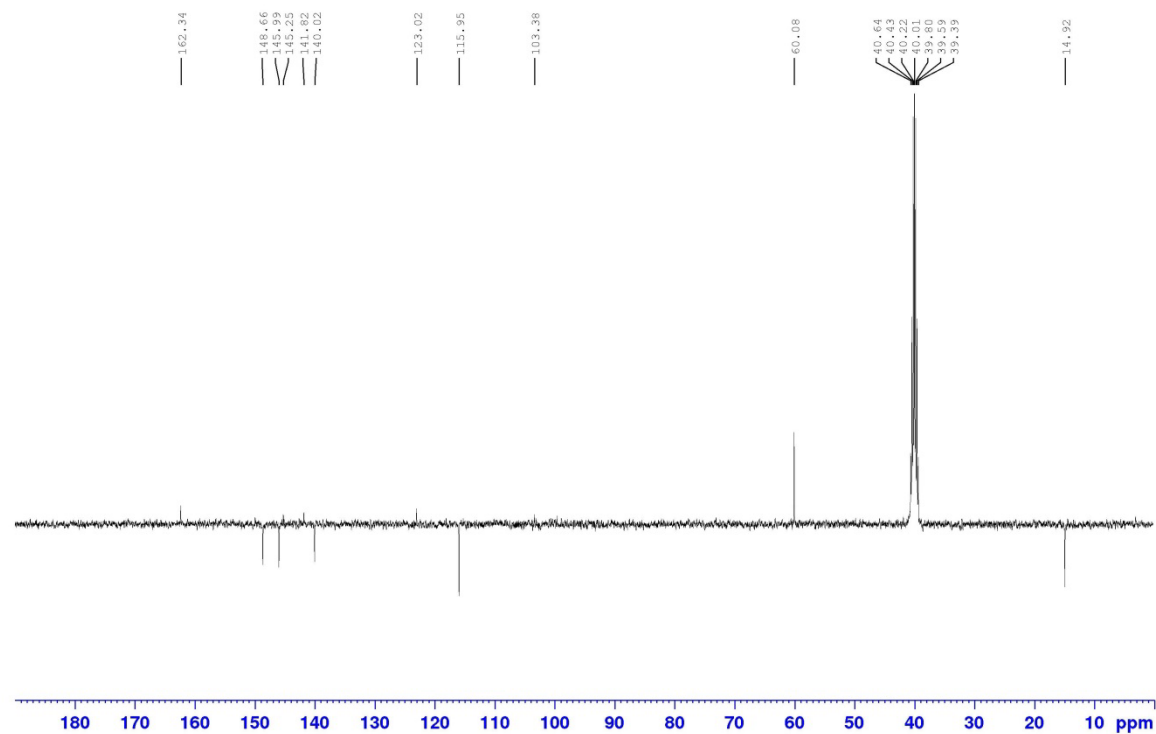

<sup>13</sup>C NMR Compound 11e  
DMSO

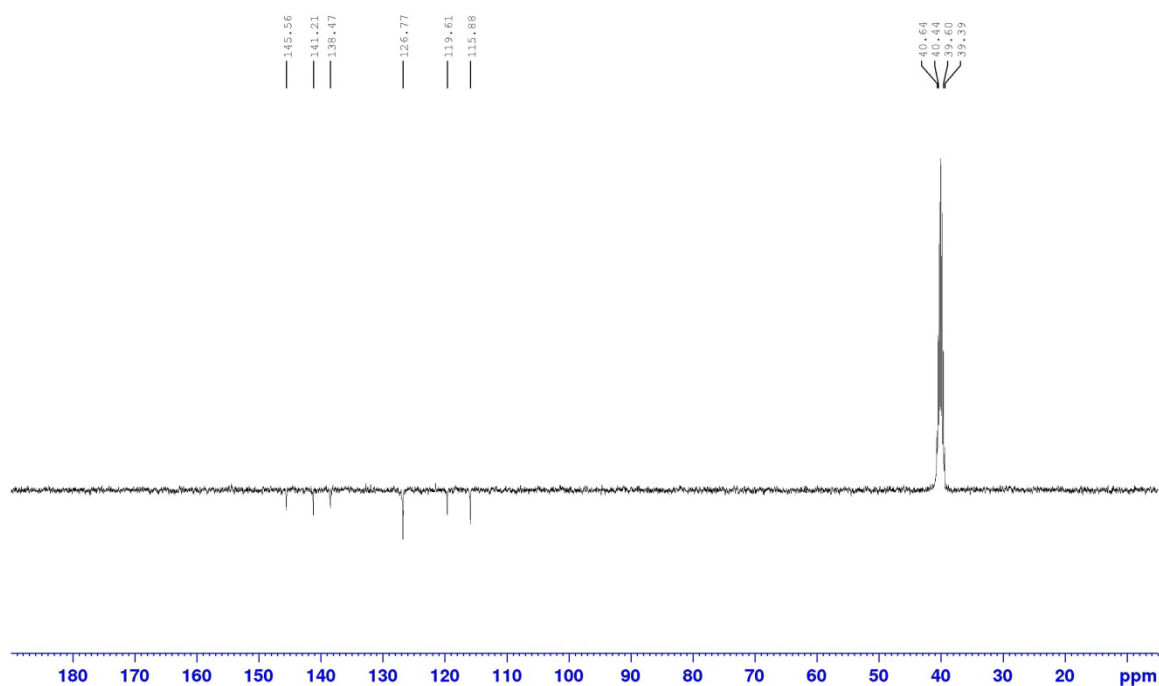

<sup>13</sup>C NMR Compound 12c  
DMSO

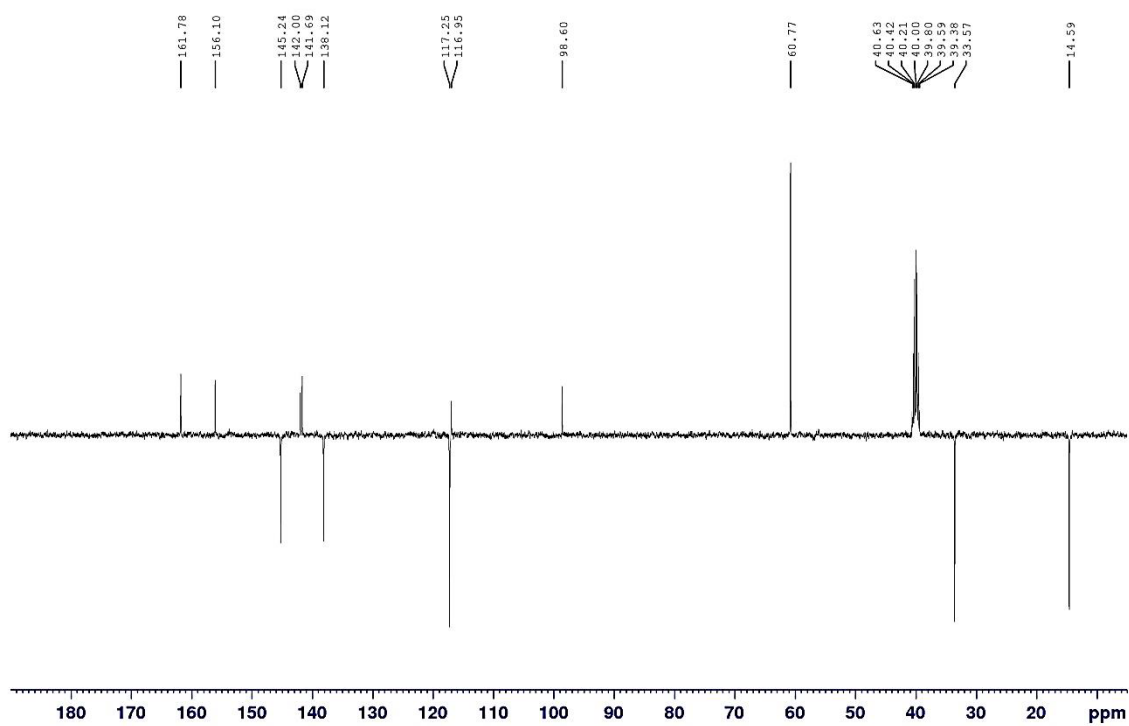

<sup>13</sup>C NMR Compound 12d  
DMSO

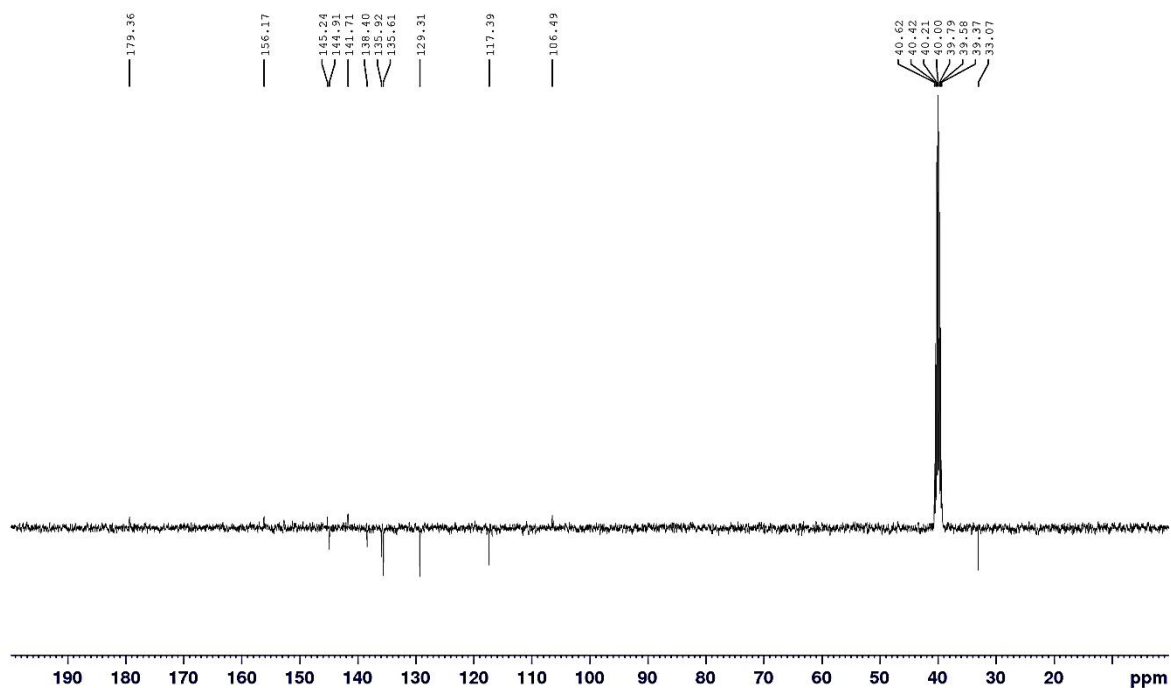

<sup>13</sup>C NMR Compound 12e  
DMSO

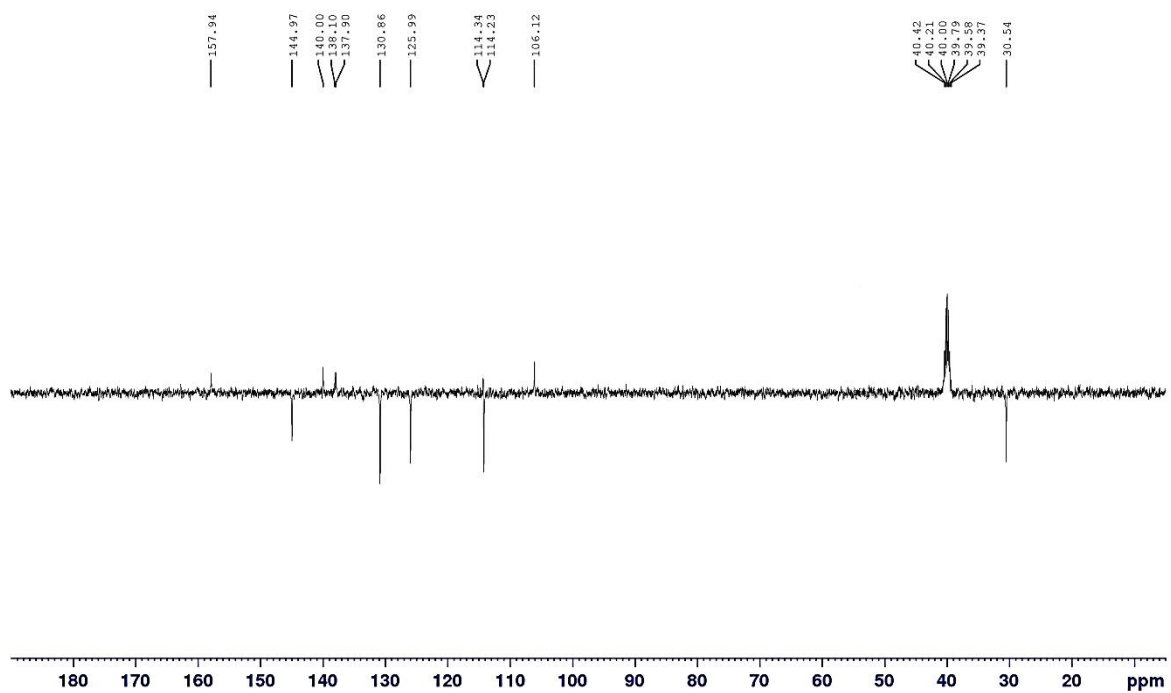

<sup>13</sup>C NMR  
Compound 12f  
DMSO

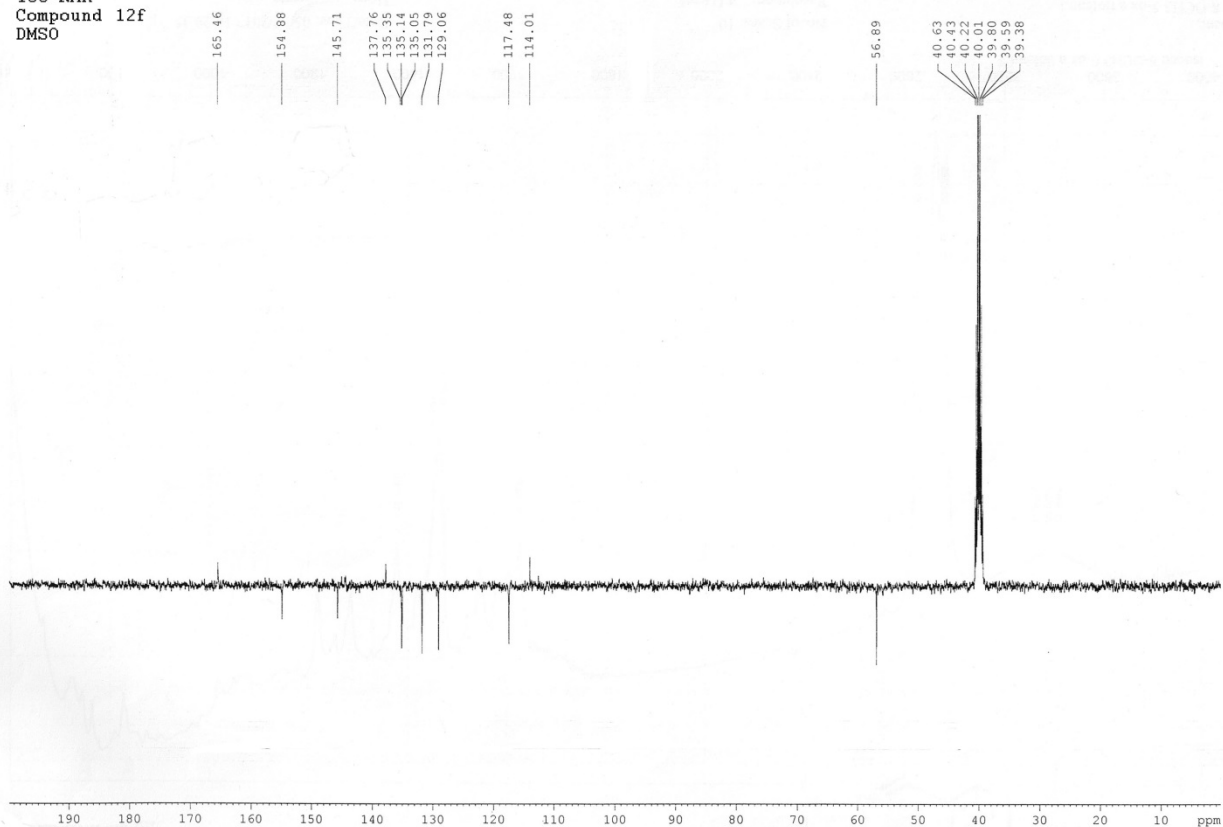

<sup>13</sup>C NMR Compound 22a  
DMSO

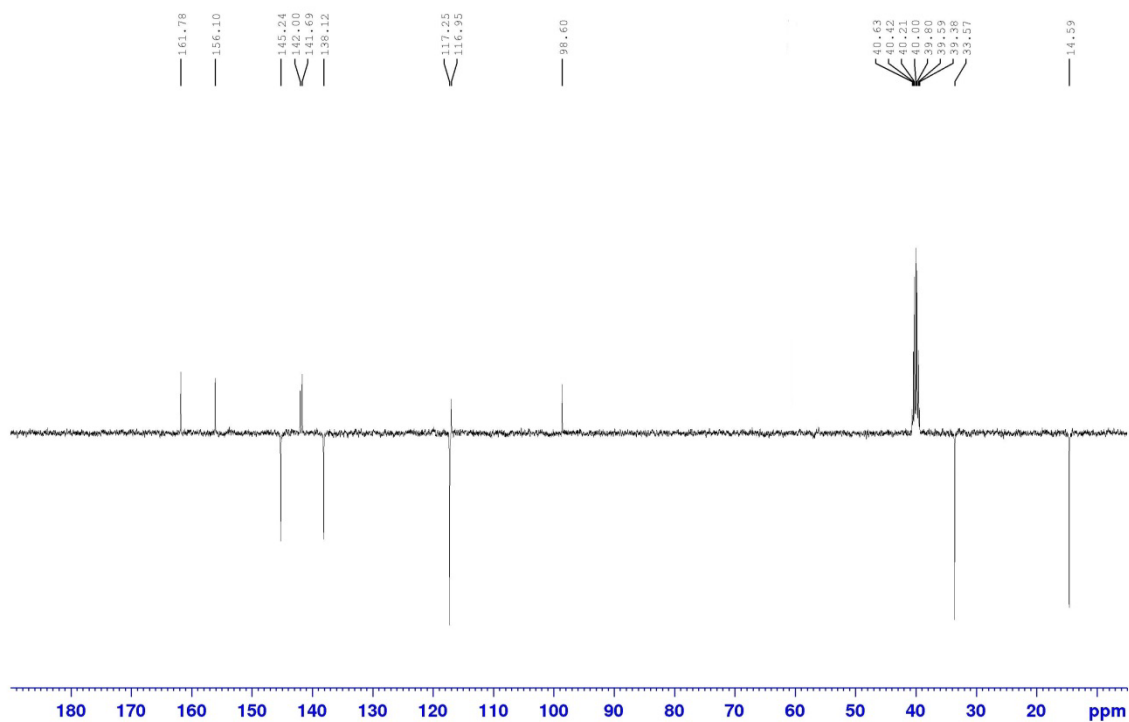

<sup>13</sup>C NMR Compound 22b  
CDCl<sub>3</sub>

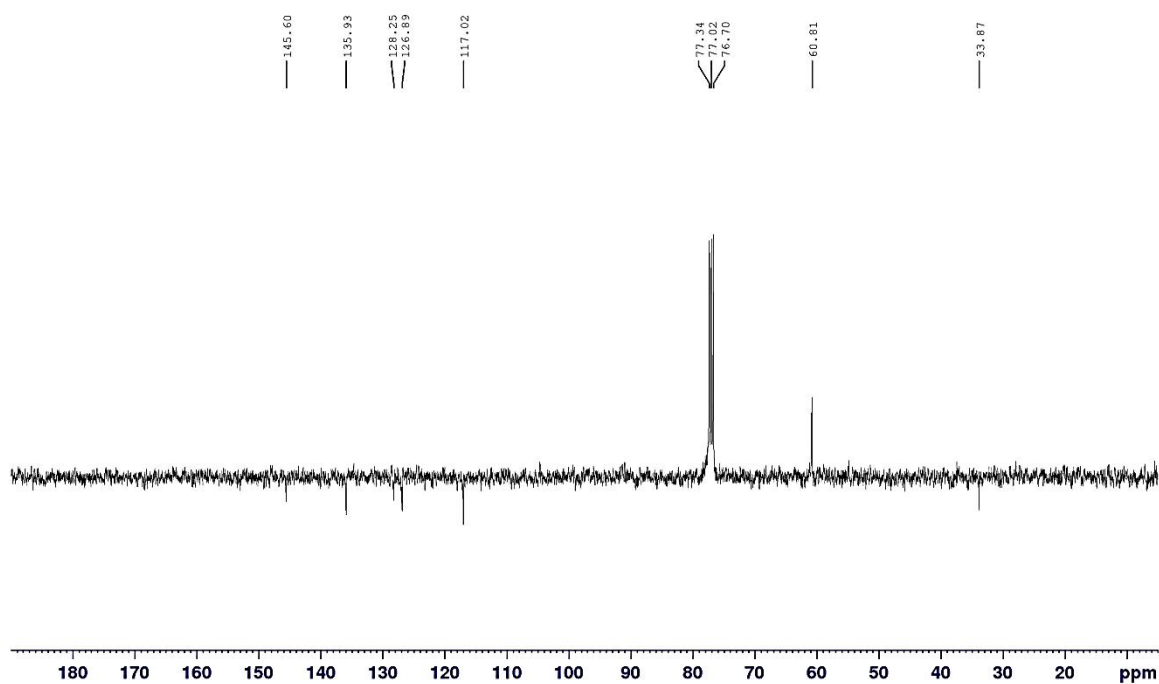

<sup>13</sup>C NMR Compound 23  
CDCl<sub>3</sub>

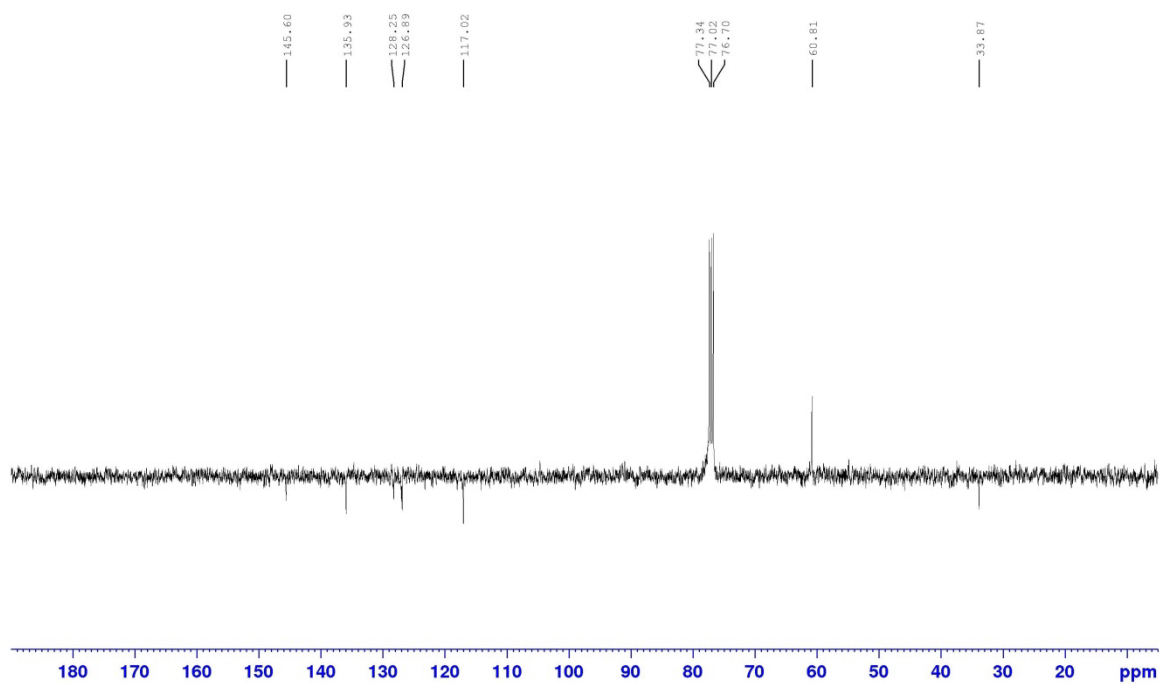

**Table S1.** Elemental analysis

| <b>Comp N°</b> | <b>Anal. Calcd.</b> |          |          | <b>Anal. Found</b> |          |          |
|----------------|---------------------|----------|----------|--------------------|----------|----------|
|                | <b>C</b>            | <b>H</b> | <b>N</b> | <b>C</b>           | <b>H</b> | <b>N</b> |
| <b>3</b>       | 49.99               | 1.86     | 25.91    | 49.79              | 1.85     | 25.80    |
| <b>4</b>       | 46.15               | 2.58     | 23.92    | 46.33              | 2.59     | 24.01    |
| <b>5</b>       | 50.18               | 3.45     | 15.96    | 50.38              | 3.46     | 16.02    |
| <b>6</b>       | 51.81               | 2.34     | 13.94    | 51.60              | 2.33     | 13.88    |
| <b>7</b>       | 52.73               | 2.58     | 15.37    | 52.52              | 2.57     | 15.31    |
| <b>8</b>       | 52.73               | 2.58     | 15.37    | 52.52              | 2.57     | 15.31    |
| <b>9c</b>      | 46.90               | 2.86     | 14.92    | 46.71              | 2.85     | 14.86    |
| <b>9d</b>      | 48.83               | 1.89     | 13.14    | 49.02              | 1.90     | 13.19    |
| <b>10c</b>     | 53.00               | 4.45     | 16.86    | 53.21              | 4.47     | 16.93    |
| <b>10d</b>     | 54.34               | 3.16     | 14.62    | 54.55              | 3.17     | 14.68    |
| <b>11c</b>     | 53.43               | 3.67     | 16.99    | 53.21              | 3.65     | 16.92    |
| <b>11d</b>     | 54.72               | 2.47     | 14.73    | 54.94              | 2.46     | 14.79    |
| <b>11e</b>     | 56.01               | 2.74     | 16.33    | 56.23              | 2.75     | 16.39    |
| <b>12a</b>     | 52.16               | 2.63     | 24.33    | 52.37              | 2.64     | 24.43    |
| <b>12b</b>     | 48.38               | 3.25     | 22.57    | 48.19              | 3.23     | 22.48    |
| <b>12c</b>     | 51.98               | 4.00     | 15.15    | 51.77              | 3.98     | 15.09    |
| <b>12d</b>     | 53.32               | 2.88     | 13.32    | 53.53              | 2.89     | 13.37    |
| <b>12e</b>     | 54.34               | 3.16     | 14.62    | 54.55              | 3.17     | 14.68    |
| <b>12f</b>     | 54.34               | 3.16     | 14.62    | 54.12              | 3.15     | 14.56    |
| <b>13b</b>     | 48.38               | 3.25     | 22.57    | 48.19              | 3.23     | 22.48    |
| <b>13e</b>     | 54.34               | 3.16     | 14.62    | 54.55              | 3.17     | 14.68    |
| <b>13f</b>     | 54.34               | 3.16     | 14.62    | 54.12              | 3.15     | 14.56    |
| <b>14</b>      | 45.96               | 2.14     | 17.86    | 45.77              | 2.13     | 17.79    |

|            |       |      |       |       |      |       |
|------------|-------|------|-------|-------|------|-------|
| <b>15</b>  | 50.25 | 2.64 | 21.98 | 50.45 | 2.65 | 22.06 |
| <b>16</b>  | 52.67 | 3.44 | 20.47 | 52.46 | 3.43 | 20.39 |
| <b>17</b>  | 46.15 | 2.58 | 23.92 | 46.33 | 2.57 | 23.82 |
| <b>18</b>  | 46.15 | 2.58 | 23.92 | 46.33 | 2.57 | 23.82 |
| <b>19</b>  | 48.19 | 2.83 | 16.86 | 48.38 | 2.84 | 16.93 |
| <b>20</b>  | 51.49 | 3.02 | 18.02 | 51.28 | 3.00 | 17.95 |
| <b>21</b>  | 48.19 | 2.83 | 16.86 | 48.38 | 2.84 | 16.93 |
| <b>22a</b> | 55.07 | 4.95 | 13.76 | 55.29 | 4.97 | 13.81 |
| <b>22b</b> | 52.16 | 3.21 | 12.17 | 52.37 | 3.22 | 12.22 |
| <b>23</b>  | 49.31 | 2.30 | 19.17 | 49.50 | 2.29 | 19.25 |
| <b>24</b>  | 54.84 | 2.88 | 23.98 | 54.62 | 2.87 | 23.88 |
| <b>25</b>  | 57.12 | 3.73 | 22.21 | 57.35 | 3.74 | 22.30 |

## General chemical structure with atoms numeration

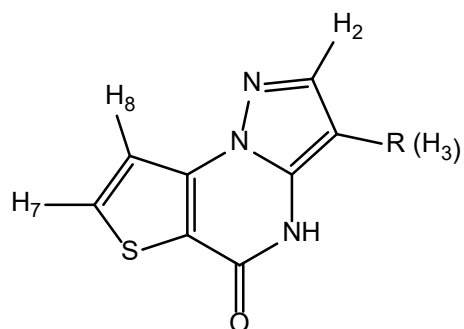

**Structure A**

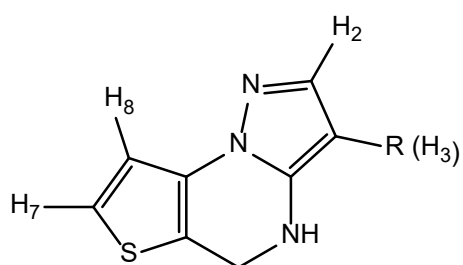

**Structure B**

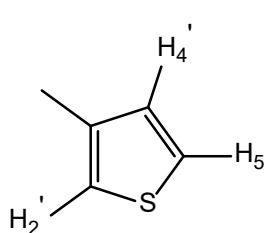

**R = 3-thienyl**

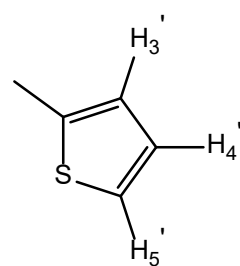

**R = 2-thienyl,**

**thien-2-ylcarbonyl  
COOCH<sub>2</sub>-2-thienyl**

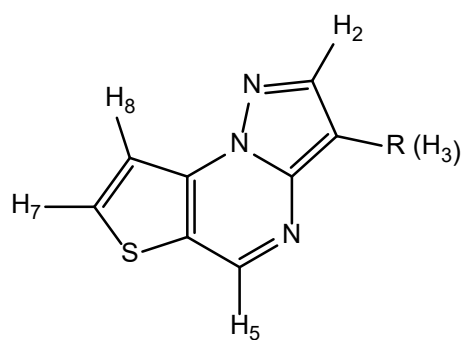

**Structure C**
